# Supplementary material for: Methylomic signature of current cannabis use in two first-episode psychosis cohorts
Source: Mol Psychiatry. 2024 Oct 16;30(4):1277–86. doi: 10.1038/s41380-024-02689-0 (PMC11919776; doi:10.1038/s41380-024-02689-0)
Supplement: Supplementary file 3 — Supplementary Tables [file 41380_2024_2689_MOESM3_ESM.xlsx]

## Sheet: TableS1
Table S1: Results from the meta-analysis between frequent cannabis users (n=188) and never users (n=494)
for extended results table click this link https://doi.org/10.6084/m9.figshare.26003827.v1
IlmnID	Effect_Fixed	SE_Fixed	P_Fixed	Het P	CHR	MAPINFO	UCSC_RefGene_Name	GREAT_anno	Beta_GAP	SE_GAP	P_GAP	Beta_Gap_Tobacco	P_GAP_Tobacco	Beta_EUGEI	SE_EUGEI	P_EUGEI	Beta_EUGEITobacco	P_EUGEI_Tobacco
cg05575921	-3.75165	0.531463	1.67587e-12	7.40296e-05	5	373378	AHRR	AHRR (+69087), C5orf55 (+69879)	-0.0147755	0.00782142	0.0603177	-0.0191513	1.69838e-62	-0.0570227	0.00724381	3.01647e-14	-0.0197171	5.66375e-124
cg11669285	-2.57484	0.494624	1.93304e-07	0.527543	17	40558061	PTRF/CAVIN1	STAT3 (-17549), PTRF (+17276)	-0.0291454	0.00730601	9.28076e-05	0.00189921	0.00973701	-0.022874	0.00672066	0.000729258	0.00156468	0.00347153
cg08086809	-0.760284	0.148108	2.84713e-07	0.407	14	82000312	SEL1L	SEL1L (-108)	-0.00900351	0.00224657	8.63541e-05	0.000532568	0.0182429	-0.00652607	0.00196976	0.00100268	0.000204059	0.191626
cg03897607	1.21514	0.241855	5.05347e-07	0.0508031	2	18768419	NT5C1B;NT5C1B	NT5C1B-RDH14 (+2426), KCNS3 (+708475)	0.0138692	0.00257349	1.97087e-07	-0.00018432	0.472914	-0.000838723	0.00707701	0.905717	0.000864523	0.123766
cg20777796	-1.05178	0.216371	1.16809e-06	0.454503	7	1980117	MAD1L1;MAD1L1;MAD1L1	ELFN1 (+231320), MAD1L1 (+292465)	-0.0114158	0.00247456	7.05058e-06	0.000918962	0.000250401	-0.00760162	0.00445908	0.0889823	0.00131333	0.000227734
cg18578898	-1.34278	0.282276	1.9651e-06	0.189941	4	122086698	TNIP3;TNIP3	NDNF (-93026), QRFPR (+215482)	-0.0106328	0.00353765	0.00298812	0.000684108	0.0535888	-0.0183257	0.00468302	0.000106256	0.00125693	0.000769163
cg26561773	3.08739	0.653934	2.34389e-06	0.282723	X	65259390	VSIG4;VSIG4	VSIG4 (+576)	0.0381654	0.00942528	7.33222e-05	0.000316586	0.736289	0.0241063	0.00908041	0.00823896	-2.4254e-05	0.973115
cg14915165	-0.544373	0.11637	2.89736e-06	0.920064	1	118471929	WDR3;GDAP2;GDAP2	WDR3 (-442), GDAP2 (+372)	-0.00536004	0.00143166	0.000236479	8.0678e-05	0.572167	-0.00560669	0.00199777	0.00524224	-9.35498e-05	0.554711
cg23063905	1.34032	0.293411	4.92207e-06	0.74891	12	48129486	RAPGEF3;RAPGEF3;RAPGEF3	ENDOU (-10132), RAPGEF3 (+23402)	0.0122364	0.00467956	0.00960274	-0.000661403	0.157429	0.0141591	0.00376643	0.000194585	-0.00128955	1.92931e-05
cg10585872	1.08893	0.24047	5.94446e-06	0.319663	22	19647281		CLDN5 (-134422), SEPT5 (-54705)	0.0141916	0.00409806	0.000652646	-0.00109715	0.00779113	0.00915518	0.00296972	0.00218584	3.60579e-05	0.878243
cg00554250	-1.564	0.348577	7.22977e-06	0.530088	11	47281370	NR1H3;NR1H3;NR1H3	MADD (-9828), NR1H3 (+1903)	-0.0128175	0.00568843	0.0253227	0.00124556	0.0290594	-0.0173371	0.00441095	9.91678e-05	0.00144868	4.09015e-05
cg26562263	-3.2615	0.727855	7.4302e-06	0.0580585	19	21863715		ZNF100 (+86714), ZNF429 (+175279)	-0.0134572	0.0124561	0.281272	0.00121592	0.328225	-0.042548	0.00896912	2.88074e-06	0.00338223	2.65975e-06
cg25331550	0.994016	0.222443	7.87217e-06	0.112731	4	3471397	DOK7;DOK7	DOK7 (+6365), LRPAP1 (+62826)	0.0146995	0.00373533	0.000114462	-0.00102506	0.00640365	0.00732488	0.00276895	0.00846727	-0.000372519	0.0901579
cg08015801	-0.400677	0.0897674	8.06314e-06	0.232136	6	26088040	HFE;HFE;HFE;HFE;HFE;HFE;HFE;HFE;HFE	HFE (+532)	-0.00525897	0.00137989	0.000183832	0.000173188	0.209085	-0.003088	0.00118197	0.00930931	7.7411e-05	0.408795
cg17188901	-0.579927	0.130752	9.19426e-06	0.18907	7	150672175	KCNH2;KCNH2	KCNH2 (+3226), ABP1 (+122603)	-0.00402419	0.00188053	0.0335658	7.47254e-05	0.690346	-0.00746052	0.00181923	4.94485e-05	0.000368758	0.0108456
cg08887146	1.02558	0.232218	1.00325e-05	0.865091	19	54058516	ZNF331;ZNF331;ZNF331	ZNF331 (+16977), LOC284379 (+48234)	0.0106655	0.00334771	0.00167307	-0.000205272	0.538834	0.00987588	0.00322389	0.00233004	-0.0005102	0.0463656
cg26703534	-1.8102	0.411393	1.0817e-05	0.169364	5	377358	AHRR	C5orf55 (+65899), AHRR (+73067)	-0.0122581	0.00591669	0.0395618	-0.00591191	1.84625e-19	-0.0235715	0.00572405	4.60598e-05	-0.0053418	7.14722e-28
cg24924958	-2.15684	0.491636	1.14886e-05	0.840976	6	142409993	NMBR	NMBR (-58)	-0.0204594	0.00739748	0.00620882	0.00187565	0.0116556	-0.0224458	0.00657972	0.000709153	0.00105932	0.0427232
cg24096387	1.24443	0.285019	1.26473e-05	0.25699	13	113534694	ATP11A;ATP11A	MCF2L (-88840), ATP11A (+190052)	0.0144242	0.00334284	2.50277e-05	-0.000327977	0.325773	0.00717245	0.00545465	0.189255	2.03757e-05	0.962408
cg24458400	-0.197494	0.0453386	1.32473e-05	0.0796364	1	36689884	THRAP3	THRAP3 (-132)	-0.00122637	0.000622854	0.0503324	5.22608e-05	0.400553	-0.00281861	0.000661235	2.49809e-05	0.00019599	0.000207987
cg06818532	-0.71418	0.16397	1.3274e-05	0.352406	3	107318032	BBX;BBX	BBX (+76250), CD47 (+491902)	-0.00628148	0.00188269	0.00101079	0.000358741	0.0571539	-0.00984434	0.00333684	0.00335376	0.00112129	2.7239e-05
cg04917576	2.01031	0.463206	1.42488e-05	0.939252	12	67337583		CAND1 (-325477), GRIP1 (-264659)	0.0196733	0.00729774	0.00761679	-0.00145702	0.0463533	0.0203931	0.00599435	0.00073311	-0.000457299	0.336035
cg25670583	1.234	0.286703	1.67667e-05	0.407345	4	715865	PCGF3	PCGF3 (+16293), CPLX1 (+104079)	0.0140831	0.00355612	0.000103895	-0.00102694	0.00415435	0.00910266	0.00484613	0.0610295	-0.000902155	0.0192234
cg14650116	0.80026	0.1861	1.70672e-05	0.0273897	9	140112941	NDOR1;NDOR1;NDOR1;NDOR1	RNF208 (+2833), NDOR1 (+12823)	0.0115205	0.00245082	4.808e-06	-0.000459378	0.0612936	0.003212	0.00286	0.262049	-0.000440132	0.0526997
cg23852670	-1.53823	0.358789	1.80877e-05	0.557749	10	1436655	ADARB2	IDI1 (-341595), ADARB2 (+343014)	-0.0173206	0.00487925	0.000479954	0.00103038	0.0352128	-0.0131002	0.00529419	0.013739	0.000214285	0.609619
cg09692449	1.2902	0.300993	1.81526e-05	0.794503	17	39680217	KRT19	KRT15 (-4948)	0.0137239	0.0043607	0.00189926	-0.000484197	0.266258	0.0121541	0.00415977	0.00366808	-0.000485721	0.141187
cg03678274	-2.03787	0.475588	1.82776e-05	0.2961	1	236017128	LYST;MIR1537	GNG4 (-203075), LYST (+13091)	-0.0149803	0.00702241	0.0341197	0.00184104	0.0091423	-0.0249527	0.00646392	0.00013112	0.00188398	0.000263994
cg27117982	-2.98936	0.698297	1.86115e-05	0.464326	12	16500077	MGST1;MGST1;MGST1;MGST1	MGST1 (-501)	-0.0232553	0.0114482	0.0435366	0.00118388	0.300393	-0.0338267	0.00881208	0.000142786	0.00135549	0.0528076
cg01870246	-0.515973	0.120639	1.89417e-05	0.587358	11	102979950	DYNC2H1;DYNC2H1	DYNC2H1 (-209)	-0.00573357	0.00160422	0.000440094	0.000168683	0.292364	-0.00441284	0.00183021	0.0163334	1.25336e-05	0.931144
cg21333674	-3.68371	0.864439	2.03165e-05	0.206104	8	96705765		GDF6 (+467254), PLEKHF2 (+559817)	-0.0233815	0.0137107	0.0896755	0.000329436	0.809614	-0.0457148	0.0111368	4.86458e-05	-0.00135533	0.125185
cg04781080	-1.46713	0.346172	2.25366e-05	0.823771	15	68924114	CORO2B	CORO2B (+15236), ANP32A (+189146)	-0.0138442	0.00507719	0.00696177	0.000734721	0.147808	-0.0153898	0.00473221	0.00123802	0.000492749	0.189366
cg15215155	-1.84374	0.435634	2.31298e-05	0.27921	7	128473311	FLNC;FLNC	ATP6V1F (-29545), FLNC (+2829)	-0.0243675	0.00700071	0.000613294	0.00144775	0.0391379	-0.0146901	0.00556506	0.00860741	0.000142459	0.746717
cg03791917	-1.07265	0.253608	2.34156e-05	0.630795	X	100641287	BTK	RPL36A-HNRNPH2 (-4590), BTK (-76)	-0.0124324	0.00436234	0.00482849	0.000724642	0.0969123	-0.00985561	0.00311693	0.00168104	0.00060708	0.014338
cg26634219	1.09427	0.259908	2.55118e-05	0.221062	17	46608277	HOXB1	HOXB1 (-6)	0.0141904	0.00371466	0.000177735	-0.000176717	0.633427	0.00782795	0.00363785	0.0319833	-0.000157305	0.585414
cg01521154	-1.20802	0.287273	2.60947e-05	0.112097	12	26111162	RASSF8;RASSF8	RASSF8 (-801)	-0.00612235	0.00472373	0.196432	0.000487233	0.301633	-0.0155769	0.00361886	2.08712e-05	0.00083919	0.00360163
cg02311152	-0.774354	0.184528	2.71186e-05	0.678132	14	71276396	MAP3K9	MAP3K9 (-509)	-0.00689317	0.00275746	0.0132254	0.000793654	0.00427848	-0.00843321	0.00248327	0.000749013	0.00039228	0.046761
cg17063780	-2.11635	0.504794	2.75887e-05	0.482173	12	103816811	C12orf42;C12orf42	STAB2 (-164257), ASCL1 (+465360)	-0.0178086	0.00694758	0.0110998	0.000993721	0.152541	-0.0249151	0.00734686	0.000761755	0.00115165	0.0484683
cg17389813	2.85604	0.68233	2.84279e-05	0.444063	11	122060265	LOC399959	UBASH3B (-466132), BLID (-73343)	0.0227458	0.0102115	0.0270254	-0.00183172	0.0732061	0.0332506	0.00917129	0.000323882	-0.00228183	0.00180242
cg01786216	1.37354	0.328163	2.8449e-05	0.0616774	12	7917888	LOC360030	NANOGNB (+77)	0.00955314	0.00397222	0.0170798	-0.000449194	0.257569	0.0227263	0.00582411	0.000111069	-0.000778385	0.0922882
cg19855573	2.3682	0.566803	2.93859e-05	0.50095	1	152297873	FLG	FLG (-195)	0.0197065	0.00818668	0.0169821	-0.000766031	0.348621	0.0273421	0.0078552	0.000552471	-0.00147853	0.0179353
cg05621843	1.66519	0.399372	3.0524e-05	0.138861	9	97806397	C9orf3	FANCC (+273593), C9orf3 (+284467)	0.0114056	0.00533989	0.0338952	-0.000254136	0.63329	0.0233116	0.00601636	0.000123858	-0.00021789	0.647744
cg20834872	1.59194	0.382845	3.20805e-05	0.0801447	13	21678647		LATS2 (-42926), SAP18 (-36005)	0.023039	0.00558672	5.44978e-05	-0.00108059	0.0535374	0.00961573	0.00525683	0.0680817	-7.57324e-05	0.855764
cg11081723	-0.264828	0.0638934	3.40047e-05	0.793689	20	3869585	PANK2;PANK2;PANK2	PANK2 (-156)	-0.0027834	0.000821692	0.00084882	0.00033013	7.79286e-05	-0.00244164	0.00101615	0.0167024	0.000100105	0.21429
cg08221350	-3.09902	0.747981	3.42514e-05	0.563507	10	134983838	KNDC1	UTF1 (-59939), KNDC1 (+9868)	-0.0261016	0.0112947	0.0218493	0.00218867	0.0531024	-0.0348089	0.00998249	0.000540122	0.00157423	0.0471369
cg09286421	-1.53637	0.371547	3.54851e-05	0.630188	7	55552130	VOPP1	VOPP1 (+88069), LANCL2 (+118990)	-0.0138756	0.00483297	0.00452957	0.00112282	0.0206602	-0.0175141	0.00580979	0.00272966	0.000795048	0.0847831
cg22999830	-0.899069	0.217796	3.65882e-05	0.902848	14	93532632	ITPK1;ITPK1;ITPK1;NCRNA00203	ITPK1 (+49630), CHGA (+143188)	-0.00917008	0.00262746	0.000593367	0.000420564	0.109608	-0.00859672	0.00389362	0.0277923	0.000984659	0.00151564
cg10673265	0.898594	0.217913	3.7294e-05	0.296861	6	33169975	SLC39A7;SLC39A7	RXRB (-1544), SLC39A7 (+1373)	0.00644163	0.00327066	0.0502673	-0.00037617	0.249563	0.011017	0.00292221	0.000186621	-0.000117442	0.612147
cg24741609	-1.64274	0.398913	3.82095e-05	0.85307	1	54122060	GLIS1	GLIS1 (+77816), DMRTB1 (+196989)	-0.01553	0.00627653	0.0141784	-0.00177013	0.00510321	-0.0170356	0.00516694	0.00106035	-0.00116399	0.00467179
cg26546310	-0.847067	0.205716	3.82752e-05	0.536146	1	159895336	TAGLN2	TAGLN2 (-53)	-0.00900981	0.00223414	7.82426e-05	0.000841224	0.000206349	-0.00546648	0.00527379	0.300549	0.00037225	0.37337
cg10937529	0.657223	0.159808	3.91273e-05	0.853312	4	1505458		CRIPAK (+120119), FAM53A (+180529)	0.00700851	0.00284985	0.0147678	-0.00086707	0.002558	0.00637212	0.0019301	0.00104428	-0.000316753	0.0388851
cg08412188	-1.10641	0.269293	3.98099e-05	0.64757	7	74074356	GTF2I;GTF2I;GTF2I;GTF2I;GTF2I	NCF1 (-113952), GTF2I (+2327)	-0.00979723	0.00386425	0.0119946	-0.000330935	0.390902	-0.0122603	0.00375487	0.00118377	0.000145368	0.625261
cg02948236	-0.59129	0.143956	4.00055e-05	0.762882	16	66864732	NAE1;NAE1;NAE1	NAE1 (+146)	-0.00635455	0.00205311	0.00224804	-5.53193e-05	0.787035	-0.0054858	0.002019	0.00685873	9.50128e-05	0.552751
cg20509092	-1.06259	0.259176	4.13399e-05	0.711397	5	74162771	FAM169A	NSA2 (+99669), GCNT4 (+163952)	-0.00943632	0.00412971	0.0233575	0.00161764	0.000115545	-0.0113988	0.00332899	0.000677572	0.00120374	6.57082e-06
cg13198793	1.47151	0.359738	4.30444e-05	0.402123	6	131705123		ARG1 (-189220), AKAP7 (+248298)	0.0173357	0.00476703	0.00035105	-0.000755274	0.113241	0.0112486	0.00548264	0.0408217	-0.000100722	0.816703
cg08096702	1.04145	0.254619	4.30956e-05	0.60952	15	31358323	MIR211;TRPM1	MTMR10 (-74517), TRPM1 (+95152)	0.0113825	0.00317412	0.000421547	-0.000411364	0.194681	0.00866733	0.0042643	0.0427297	-0.000260779	0.440511
cg04836442	1.15173	0.281742	4.35287e-05	0.451832	1	181204428		CACNA1E (-248257), MR1 (+201868)	0.0134142	0.00378078	0.000483143	-0.000786036	0.0381147	0.00914857	0.00422499	0.0309246	-0.00116643	0.000543103
cg25727093	-1.41759	0.347168	4.44022e-05	0.408302	20	44463168	SNX21;SNX21;SNX21;SNX21	SNX21 (+699)	-0.0173637	0.00518798	0.000975328	0.000488974	0.345133	-0.0115908	0.00467187	0.013494	-0.000172158	0.642011
cg08895932	2.3783	0.58253	4.45119e-05	0.0804282	1	152778580	LCE1C	LCE1C (+526)	0.0152567	0.00759743	0.0459666	0.000773815	0.307721	0.0359466	0.00907436	8.75819e-05	-0.00232957	0.00128589
cg23704066	0.36919	0.0908161	4.79803e-05	0.102465	7	96339024	SHFM1	SHFM1 (+178)	0.00275554	0.00107403	0.0110276	-0.000159653	0.137148	0.0060408	0.00170109	0.000427085	-0.000496057	0.000262084
cg12644353	-0.962657	0.236876	4.82446e-05	0.649854	2	114647787	ACTR3;ACTR3	ACTR3 (+251)	-0.010278	0.0027695	0.000267076	0.000373814	0.176884	-0.00785147	0.00457173	0.0866454	0.000792706	0.0291421
cg13859771	1.83137	0.451219	4.93416e-05	0.596194	10	101421142	ENTPD7	CUTC (-70815), ENTPD7 (+1880)	0.0205743	0.00620967	0.00109359	-0.00117051	0.0598553	0.0157849	0.00656777	0.0166775	-0.000876418	0.0927909
cg20633370	-1.60298	0.395078	4.96263e-05	0.232381	17	847577	NXN	GLOD4 (-162007), NXN (+35420)	-0.0220197	0.00638475	0.000685932	0.00122035	0.0563968	-0.0123133	0.00502924	0.0147607	-0.000385725	0.333458
cg08233864	0.95714	0.23618	5.06566e-05	0.670656	13	113631110	MCF2L	F7 (-128994), MCF2L (+7576)	0.00803329	0.00431978	0.0643962	-0.00100345	0.0206774	0.0102272	0.00282073	0.000323616	-0.0010861	1.65316e-06
cg19667791	1.7033	0.421568	5.33638e-05	0.290231	4	137673645		PCDH18 (+779983)	0.0131117	0.00561413	0.0205042	0.0001639	0.769737	0.0221025	0.00638342	0.000590279	-0.000758173	0.134499
cg01481544	-4.19059	1.03764	5.37723e-05	0.512118	8	987739		C8orf42 (-492409), DLGAP2 (-461829)	-0.0491472	0.0151555	0.00138551	0.002382	0.116132	-0.0355162	0.0142364	0.0129887	-0.000566542	0.61564
cg06820837	0.947675	0.234805	5.43663e-05	0.238537	12	52436478		NR4A1 (-8707), GRASP (+35731)	0.00646281	0.00347162	0.0641178	-0.00031462	0.363965	0.012018	0.00318778	0.000186673	-7.21896e-05	0.775095
cg13369831	0.981981	0.243427	5.48391e-05	0.367766	6	33375650	KIFC1	PHF1 (-3122)	0.0117368	0.00323356	0.000359962	-0.000478378	0.139016	0.0073123	0.0036982	0.0486673	9.05729e-05	0.757324
cg20708199	1.61469	0.400282	5.48592e-05	0.812676	1	181062601		CACNA1E (-390084), MR1 (+60041)	0.0171973	0.00597225	0.00441403	-0.000475426	0.425086	0.0152903	0.00539355	0.00480556	-0.000502976	0.239728
cg12596505	-0.650356	0.161279	5.51918e-05	0.682156	1	213090240		VASH2 (-33646), FLVCR1 (+58644)	-0.00735909	0.00263921	0.00580623	0.000239618	0.363094	-0.00599367	0.00203748	0.00344525	0.000468914	0.00386033
cg27592794	-1.27096	0.315292	5.55252e-05	0.0215199	10	74454766	CCDC109A	OIT3 (-198572), MCU (+2878)	-0.0193448	0.00427464	1.03027e-05	0.00209384	1.8145e-06	-0.00479281	0.00466925	0.305266	0.000678862	0.0671343
cg04981203	-0.608903	0.151096	5.58016e-05	0.141678	15	75182231	MPI	MPI (-178)	-0.00989442	0.00299805	0.00114268	0.000170953	0.56762	-0.00479337	0.00174938	0.00640573	6.56886e-06	0.962212
cg24800063	-0.657709	0.1634	5.694e-05	0.297229	19	6481729	DENND1C;DENND1C	DENND1C (+68)	-0.00853814	0.00249184	0.000741499	0.000206384	0.406641	-0.00509771	0.00216428	0.0189636	0.000246819	0.150677
cg16704920	1.61617	0.402548	5.94805e-05	0.0243695	1	2169407	SKI	RER1 (-153806), SKI (+9274)	0.0257517	0.00586094	1.80174e-05	0.000578202	0.323122	0.00759792	0.00553851	0.170849	0.000499845	0.255192
cg04210991	-0.530907	0.132272	5.97656e-05	0.984836	1	226374609	ACBD3	ACBD3 (-187)	-0.00532836	0.00166741	0.00162063	0.000388161	0.0204093	-0.00527631	0.00217247	0.015572	0.000198663	0.248954
cg04753872	0.469044	0.116869	5.9847e-05	0.77382	2	242438285	STK25	STK25 (+9748), FARP2 (+142622)	0.00504976	0.00171149	0.0035493	-0.000295331	0.0847177	0.00437651	0.00159972	0.00648724	-0.000310144	0.0147886
cg03586128	1.39329	0.347526	6.0935e-05	0.483549	13	113299796		TUBGCP3 (-57316), ATP11A (-44846)	0.0110172	0.0054219	0.0434721	-0.000957964	0.0775881	0.0159661	0.00452762	0.000467819	-0.000529685	0.14043
cg06178383	-2.45544	0.612731	6.13992e-05	0.37501	16	23213204	SCNN1G	SCNN1B (-100386), SCNN1G (+19165)	-0.03063	0.00918959	0.00102226	0.00136029	0.138794	-0.0196912	0.00822163	0.0170563	6.75837e-05	0.917394
cg02743878	-1.46035	0.36479	6.24753e-05	0.456564	2	169937094	DHRS9;DHRS9;DHRS9;DHRS9	DHRS9 (-522)	-0.0182623	0.00612024	0.00319853	0.000425766	0.485695	-0.0125875	0.0045431	0.00584292	0.000652821	0.070371
cg25178913	1.59488	0.398772	6.34779e-05	0.918709	11	19301951		NAV2 (-432929), E2F8 (-39445)	0.0162924	0.00521829	0.00205994	-0.000957152	0.067009	0.0154667	0.00618248	0.0127405	-0.00067572	0.168367
cg13962589	1.39017	0.347714	6.38766e-05	0.636262	9	131647126	LRRC8A;LRRC8A;LRRC8A	CCBL1 (-2773), LRRC8A (+2736)	0.0120514	0.00523423	0.0223356	-0.000416952	0.424779	0.0153632	0.00465195	0.00104038	-0.000877062	0.0177468
cg26134090	1.2267	0.306921	6.42093e-05	0.349862	4	48909057	OCIAD2;OCIAD2	OCIAD2 (-243)	0.00911512	0.00455926	0.046928	-0.000642419	0.158704	0.014879	0.00415051	0.000376971	-0.00126505	0.000137635
cg26603632	0.93628	0.234375	6.47497e-05	0.72802	17	80201887		SLC16A3 (+15606), CSNK1D (+29706)	0.0101261	0.00321097	0.00185997	-9.62032e-05	0.76387	0.00849243	0.00342886	0.0136523	-0.000153834	0.571418
cg22958188	0.804905	0.201571	6.51983e-05	0.63068	13	112238798		SOX1 (-483114), C13orf16 (+265784)	0.0093615	0.00339344	0.00633862	-0.000754226	0.0267508	0.00733349	0.00250566	0.00361146	-0.00019925	0.315987
cg25058482	-0.912621	0.228651	6.57024e-05	0.258477	2	161993315	TANK;TANK	TANK (-150)	-0.00724179	0.00283003	0.0112358	0.000199228	0.480508	-0.0126688	0.00388029	0.00118488	0.000807003	0.00896442
cg06478195	0.520268	0.130388	6.60291e-05	0.523001	17	3775662	CAMKK1;CAMKK1;CAMKK1	C17orf85 (-26123), CAMKK1 (+18374)	0.00393938	0.00236895	0.0978874	-0.000344399	0.145951	0.00575171	0.00156172	0.000260743	-0.000121868	0.325101
cg25397718	-0.418575	0.105211	6.93747e-05	0.141886	9	140317786	EXD3;NOXA1	EXD3 (-73), NOXA1 (-60)	-0.00582774	0.00153514	0.000194476	0.000340373	0.0271173	-0.00273135	0.00144479	0.0593833	3.83798e-05	0.737512
cg02472414	-0.316268	0.0795122	6.96115e-05	0.201615	3	138313320	CEP70	CEP70 (-192)	-0.00415318	0.0011108	0.000240949	9.78434e-05	0.377552	-0.00212188	0.00113866	0.0630929	4.69189e-05	0.603188
cg19825182	1.01776	0.2559	6.97386e-05	0.913513	13	99948367	GPR183;UBAC2;UBAC2;UBAC2	GPR18 (-37528), GPR183 (+11381)	0.0104307	0.00346122	0.00291396	-0.000636481	0.0663229	0.00987244	0.00380047	0.00971601	-0.00115278	0.000148042
cg16660345	-0.453701	0.114172	7.07185e-05	0.367692	4	1004547	FGFRL1;FGFRL1	FGFRL1 (-1212)	-0.00356512	0.00157085	0.0242966	9.25465e-05	0.554841	-0.00562534	0.00166228	0.000781365	0.000244148	0.0644006
cg13746919	1.06637	0.268397	7.09445e-05	0.444325	10	81837573	C10orf57;LOC219347;LOC219347;LOC219347;LOC219347;LOC219347	FAM213A (-852)	0.0124924	0.00359434	0.000624491	-0.000264386	0.461062	0.00835886	0.00403523	0.0389262	-0.000883893	0.00593619
cg20745568	0.301456	0.0758973	7.13018e-05	0.949962	17	40321545	KCNH4	RAB5C (-14484), KCNH4 (+11750)	0.00296218	0.00112816	0.0093129	-9.45966e-05	0.400861	0.00305787	0.00102583	0.00304161	-0.000103302	0.204312
cg10777887	-0.816075	0.205489	7.14571e-05	0.645753	15	63484315	RAB8B	APH1B (-85433), RAB8B (+2588)	-0.00731787	0.00275408	0.00851498	0.000363376	0.186773	-0.00921928	0.00308633	0.00298145	0.000978144	7.45136e-05
cg04338556	1.25347	0.315635	7.14904e-05	0.717495	15	31318286	TRPM1	MTMR10 (-34480), TRPM1 (+135189)	0.0110223	0.00523806	0.0365986	-5.68141e-06	0.991322	0.013397	0.00395504	0.000772484	-0.00067122	0.0327197
cg13973594	1.36825	0.344714	7.21058e-05	0.644358	14	60339823		RTN1 (-2267)	0.0117777	0.00537676	0.0296391	0.000330629	0.537676	0.0150118	0.00449174	0.000906109	6.26735e-05	0.860256
cg06193988	-0.60186	0.151787	7.3343e-05	0.38862	2	10442521	HPCAL1;HPCAL1	HPCAL1 (-518)	-0.00484543	0.00203855	0.0183976	0.000179918	0.376611	-0.00747824	0.00227385	0.00109108	0.000377953	0.0364603
cg00571434	1.20488	0.304385	7.54498e-05	0.769824	6	28550427	SCAND3	SCAND3 (+4684), GPX5 (+56639)	0.0110935	0.00446377	0.0137634	-0.000261294	0.557382	0.0128791	0.00416142	0.00210091	-0.000211645	0.521166
cg10459029	-0.425812	0.107856	7.88215e-05	0.236832	2	242640849	ING5	ING5 (-606)	-0.00267831	0.00171664	0.120284	-6.68489e-06	0.968851	-0.00528854	0.00138638	0.000156906	0.000134563	0.221117
cg02025971	2.13534	0.54113	7.94397e-05	0.25462	5	16738318	MYO10	FAM134B (-121152), MYO10 (+198066)	0.0297908	0.00917263	0.00136294	-0.00263744	0.00431628	0.0168495	0.00670174	0.0123042	-0.00178545	0.000840419
cg05287917	1.42803	0.361951	7.96735e-05	0.170121	14	104789261		C14orf180 (-256794), KIF26A (+184202)	0.0197884	0.00540579	0.000321601	-0.000787511	0.145128	0.00980434	0.00487308	0.0448661	0.000540321	0.162302
cg13734106	-1.40719	0.356789	8.01208e-05	0.597241	10	131691178	EBF3	EBF3 (+70912), MGMT (+425725)	-0.0123526	0.00482887	0.0112619	0.000227774	0.636309	-0.0161389	0.00529477	0.00244884	0.000688134	0.101589
cg22128035	-0.788415	0.199978	8.06369e-05	0.817339	2	47168977	MCFD2;MCFD2;TTC7A;MCFD2;MCFD2	TTC7A (+665)	-0.00837457	0.00291677	0.00452761	-0.000144317	0.619894	-0.00744913	0.00274709	0.00697057	0.000297209	0.172704
cg04069374	-1.41718	0.359627	8.12477e-05	0.0822419	X	119445076	FAM70A;FAM70A;FAM70A	FAM70A (+314)	-0.0198408	0.00485537	6.32988e-05	0.00134903	0.0057853	-0.00728192	0.00535273	0.174431	0.000345673	0.415361
cg16692211	1.05709	0.268356	8.17796e-05	0.78138	11	46727036	ZNF408	ARHGAP1 (-4917), ZNF408 (+4720)	0.0114103	0.00404345	0.00525323	-8.42545e-05	0.834497	0.0099101	0.00358757	0.00599137	5.24195e-05	0.853735
cg07078467	0.58874	0.149594	8.29926e-05	0.37282	17	78893612	RPTOR;RPTOR	CHMP6 (-72028), RPTOR (+374988)	0.00739068	0.00225458	0.0012315	-0.000512597	0.0234939	0.00470507	0.00199947	0.0190761	-4.53356e-05	0.774824
cg01278596	-0.416556	0.105872	8.33641e-05	0.460405	5	139228062	NRG2;NRG2;NRG2;NRG2	PSD2 (+52657), NRG2 (+194821)	-0.00320453	0.00167804	0.0575975	0.000353321	0.0357471	-0.00480111	0.00136461	0.000481858	0.000288372	0.00792809
cg09549329	1.09449	0.27819	8.34329e-05	0.9175	1	169854522	SCYL3;SCYL3	METTL18 (-90492), SCYL3 (+8553)	0.0107017	0.00364019	0.00366812	-0.00039677	0.275113	0.0112863	0.00431329	0.00920121	-0.000427746	0.211266
cg21118939	1.22969	0.312699	8.40611e-05	0.311357	2	177682959		HNRNPA3 (-394462), MTX2 (+548837)	0.0155234	0.00446489	0.000621848	-0.00121697	0.00676407	0.00919089	0.00438077	0.0365029	-0.000973955	0.00523643
cg05035616	1.14238	0.290778	8.54068e-05	0.164972	16	56374523	GNAO1;GNAO1	AMFR (+84920), GNAO1 (+149273)	0.0166749	0.0047704	0.000582165	-0.0011359	0.0177391	0.0083193	0.00366797	0.0238316	-0.000935099	0.00138853
cg08670465	-0.723714	0.18432	8.62244e-05	0.202754	5	169725100	LCP2	LCP2 (-279)	-0.00519689	0.00244194	0.03454	9.38401e-05	0.700032	-0.00993876	0.00280999	0.000450018	0.000718729	0.00133926
cg17631429	1.14621	0.291946	8.63356e-05	0.823637	20	30433233	FOXS1	FOXS1 (+186)	0.012097	0.00407918	0.00338714	-0.000299335	0.462129	0.0107953	0.00418015	0.0101465	-0.000155594	0.63865
cg01095590	-0.410934	0.104706	8.68643e-05	0.0165541	1	175161785	KIAA0040;KIAA0040;KIAA0040;KIAA0040;KIAA0040;KIAA0040	TNN (+124792), TNR (+550966)	-0.00611721	0.00134102	8.81953e-06	0.000279438	0.0376817	-0.000973504	0.00167588	0.561627	-0.000189398	0.154383
cg23506728	2.0168	0.513996	8.71763e-05	0.60847	3	131280698	CPNE4	ACPP (-755512), MRPL3 (-58839)	0.0236494	0.008521	0.00603332	-0.000616247	0.468614	0.0181767	0.00644443	0.00502232	-0.00133512	0.00922986
cg14718363	-0.356452	0.0909754	8.92461e-05	0.328875	2	43358521		HAAO (-338771), ZFP36L2 (+95223)	-0.00437464	0.0012313	0.000474796	2.71713e-05	0.824883	-0.00259057	0.00135006	0.055682	0.000197938	0.0648742
cg01717446	-0.685567	0.174977	8.92709e-05	0.471528	2	71503566		ZNF638 (-55318), PAIP2B (-49334)	-0.0078461	0.00222575	0.000524123	0.000295755	0.183674	-0.00525317	0.00283116	0.064229	0.000410493	0.0678847
cg12968518	-2.17158	0.554344	8.95139e-05	0.325942	2	148602504	ACVR2A	ACVR2A (-65)	-0.0282323	0.00864505	0.00128364	0.00169436	0.0504679	-0.0171654	0.00722412	0.0179443	0.000166959	0.770599
cg13420364	1.8011	0.459851	8.97729e-05	0.586849	1	234857659		IRF2BP2 (-112389), TOMM20 (+434596)	0.021088	0.00729454	0.0042633	-0.00209354	0.00438718	0.0159816	0.00592388	0.00726119	-0.00144083	0.00227477
cg19715771	-1.25361	0.320184	9.02954e-05	0.820568	17	77810912	CBX4	CBX8 (-39998), CBX4 (+2300)	-0.0134498	0.00514569	0.00963186	0.000927785	0.0717473	-0.0119589	0.00409009	0.00364464	0.000578142	0.0750562
cg22360318	-1.12537	0.28746	9.04473e-05	0.33415	17	10030599	GAS7	RCVRN (-221916), GAS7 (+71268)	-0.0146435	0.00453676	0.00145706	0.000759331	0.0944233	-0.00897992	0.00371567	0.0160852	0.000443588	0.132511
cg21204588	0.975932	0.249295	9.04899e-05	0.283496	15	50316779	ATP8B4	ATP8B4 (+94639), FGF7 (+601405)	0.0123705	0.00348462	0.000479624	-0.000658671	0.0591536	0.00702167	0.00356799	0.0497311	-0.000307111	0.277803
cg11389756	-1.42754	0.364773	9.09705e-05	0.690819	6	28875354	TRIM27	SCAND3 (-320243), TRIM27 (+16413)	-0.0157312	0.00516745	0.00264434	0.000119081	0.817262	-0.0128294	0.00514995	0.0131181	0.000972043	0.0176202
cg05816041	1.48419	0.37952	9.20273e-05	0.0288261	4	88786914		HSP90AB3P (-26080), MEPE (+32794)	0.0249783	0.00599232	4.5571e-05	-0.000632198	0.290758	0.00805257	0.00490417	0.101343	-0.000185049	0.634055
cg06179837	1.09341	0.27976	9.29126e-05	0.698275	8	142190095	DENND3	PTK2 (-178684), SLC45A4 (+48577)	0.0098448	0.00396522	0.0138548	-0.000871072	0.0285455	0.0120138	0.00394764	0.00248747	-0.000295488	0.345204
cg15942185	0.959706	0.245607	9.32609e-05	0.599681	7	129912487	CPA2	CPA4 (-20486), CPA2 (+5785)	0.00778421	0.00423817	0.0677323	-0.000265511	0.53007	0.0105137	0.00301371	0.000536932	4.38866e-05	0.854222
cg23926436	-1.84915	0.474324	9.6795e-05	0.280137	17	12133847		MYOCD (-435359), MAP2K4 (+209713)	-0.0121997	0.00751243	0.105957	0.000684519	0.361372	-0.0226624	0.0061166	0.000239667	0.000870118	0.0732206
cg05517438	1.58318	0.406179	9.70929e-05	0.845479	2	227503673		IRS1 (+159832)	0.0165139	0.00536177	0.00236001	-0.00119878	0.0258728	0.0149132	0.00622229	0.0169792	-0.00105218	0.0333525
cg06159667	2.26576	0.581443	9.74787e-05	0.16286	X	103268258	H2BFWT;MIR1256	H2BFWT (-3)	0.0298763	0.0077824	0.000165488	-0.000950385	0.221595	0.013537	0.00874767	0.122498	-0.00107909	0.120134
cg10621576	-0.679833	0.174515	9.79697e-05	0.580993	13	112714526		SOX1 (-7386), C13orf16 (+741512)	-0.00590597	0.00237897	0.0138629	0.000173545	0.464764	-0.00783801	0.00256785	0.00241506	0.000431231	0.0345792
cg15070677	0.421505	0.108225	9.83162e-05	0.95276	6	33288804	DAXX;DAXX;DAXX;DAXX	ZBTB22 (-3086)	0.00417392	0.00128586	0.00137112	-0.000153939	0.23079	0.00431498	0.0020041	0.0318824	-0.000491542	0.00208973
cg11579069	-0.499116	0.128159	9.83984e-05	0.707758	6	135502794	MYB;MYB;MYB;MYB;MYB;MYB;MYB;MYB	MYB (+342)	-0.00562528	0.00212224	0.00867401	0.000337234	0.112188	-0.00462717	0.00160787	0.00420916	1.46454e-07	0.999083
cg06583549	0.930928	0.239106	9.88641e-05	0.816954	19	46387962	IRF2BP1	IRF2BP1 (+1413), FOXA3 (+20445)	0.00999951	0.00382227	0.00956877	-0.000945739	0.0138008	0.00886551	0.00306478	0.00401848	-0.000600636	0.0137471
cg24111710	0.847272	0.217743	9.97698e-05	0.177807	7	152063974	MLL3	MLL3 (+69115), GALNT11 (+341197)	0.0111869	0.00296615	0.000213358	-0.00019261	0.515168	0.00530068	0.0032066	0.0990695	9.05219e-05	0.72172

## Sheet: TableS2
Table S2: Results from the EWAS analysis for current cannabis use in the GAP cohort
IlmnID	Beta	SE	P	Beta_Tobacco	P_Tobacco	CHR	MAPINFO	UCSC_RefGene_Name	GREAT_annotation
cg03897607	0.0138692	0.00257349	1.97087e-07	-0.00018432	0.472914	9	139232762	NT5C1B	NT5C1B-RDH14 (+2426), KCNS3 (+708475)
cg14650116	0.0115205	0.00245082	4.808e-06	-0.000459378	0.0612936	5	7880486	NDOR1	RNF208 (+2833), NDOR1 (+12823)
cg12378867	0.020288	0.00433986	5.38778e-06	-0.0011345	0.0093409	2	88249487	ADCY2	FASTKD3 (+41663), ADCY2 (+431144)
cg14734994	0.0139669	0.00300305	5.98263e-06	-0.000408169	0.173892	7	1946643	THNSL2	THNSL2 (-4285)
cg20777796	-0.0114158	0.00247456	7.05058e-06	0.000918962	0.000250401	1	109883817	MAD1L1	ELFN1 (+231320), MAD1L1 (+292465)
cg26155492	-0.0303614	0.00659946	7.45054e-06	0.00121081	0.0669378	1	173428408	GPR61	GPR61 (-199)
cg01095590	-0.00611721	0.00134102	8.81953e-06	0.000279438	0.0376817	10	74124772	KIAA0040	TNN (+124792), TNR (+550966)
cg27592794	-0.0193448	0.00427464	1.03027e-05	0.00209384	1.8145e-06	7	157278618	CCDC109A	OIT3 (-198572), MCU (+2878)
cg15272173	-0.0315872	0.00701557	1.13709e-05	0.00162314	0.0211839	2	74444251	PTPRN2	DNAJB6 (+456148), PTPRN2 (+794624)
cg19276371	0.0204236	0.00463098	1.68153e-05	-0.00140916	0.00255476	1	2159267	DCTN1;DCTN1;DCTN1;DCTN1	SLC4A5 (-48592), DCTN1 (+16738)
cg16704920	0.0257517	0.00586094	1.80174e-05	0.000578202	0.323122	12	54409490	SKI	RER1 (-153806), SKI (+9274)
cg27215108	-0.00633248	0.00144144	1.80637e-05	0.000190127	0.186907	13	105942354	CD63;CD63	CD63 (-314)
cg17906168	0.0445739	0.0102649	2.23351e-05	-0.00312213	0.00256566	15	60301066	EFNB2	EFNB2 (+43034)
cg14478815	0.0377936	0.0087147	2.28632e-05	-0.00152931	0.0796049	17	37864614		TLN2 (-425735), C2CD4B (-56293)
cg04264042	-0.0123692	0.0028523	2.28821e-05	0.000939716	0.00111397	1	177529612	ATP6V0A1	ATP6V0A1 (+227)
cg27230496	-0.00612897	0.00141563	2.35643e-05	0.000115098	0.415287	13	112582695	SOAT1	SOAT1 (+141)
cg24096387	0.0144242	0.00334284	2.50277e-05	-0.000327977	0.325773	1	148868724	ATP11A;ATP11A	MCF2L (-88840), ATP11A (+190052)
cg07314391	-0.00919116	0.00217268	3.54413e-05	0.000251568	0.246403	10	105335193	ENSA	ENSA (-3)
cg10106016	0.0160387	0.00381819	4.00009e-05	-0.000235805	0.535918	16	30597454	NEURL	NEURL (+91469), SH3PXD2A (+269960)
cg10236224	-0.0313902	0.00747986	4.06511e-05	0.00046542	0.532858	19	54659349		ZNF689 (-68272), SRCAP (-20508)
cg08326933	0.0165771	0.0039509	4.07912e-05	-0.000592127	0.133962	11	1728131	ALDH16A1;ALDH16A1	FLT3LG (-9928), ALDH16A1 (+11065)
cg14278057	0.0282218	0.00673445	4.16471e-05	-0.00169891	0.0120779	5	180228802	HCCA2	IFITM10 (+268)
cg07372840	0.00666037	0.00159281	4.32174e-05	-0.000175405	0.270201	7	105711887		BTNL8 (-29880), ZFP62 (-7911)
cg19772754	-0.00533148	0.00127576	4.36484e-05	0.00036383	0.00463684	6	90179177	NAMPT	NAMPT (+986)
cg17552046	-0.00817653	0.00195688	4.37754e-05	0.000446138	0.0231192	17	9090777	RRAGD	RRAGD (-464)
cg21322120	0.0200467	0.0047978	4.37827e-05	-0.00132198	0.00619571	4	89005938		NTN1 (+225194), STX8 (+329222)
cg05816041	0.0249783	0.00599232	4.5571e-05	-0.000632198	0.290758	11	605950		HSP90AB3P (-26080), MEPE (+32794)
cg14067770	-0.0207155	0.00497827	4.69146e-05	0.000747506	0.133235	X	128699683	IRF7	IRF7 (+48)
cg19227523	-0.0244903	0.00589209	4.7814e-05	0.00156671	0.00821297	6	7258383	XPNPEP2	XPNPEP2 (-943)
cg18864497	-0.0106851	0.0025769	4.97762e-05	0.00014816	0.564408	17	46201188	SSR1;SSR1	SSR1 (+156)
cg19241878	-0.0231514	0.00560053	5.23775e-05	0.000636341	0.25532	X	11356130	C17orf73	WFIKKN2 (-66415), LUC7L3 (+49264)
cg18336502	-0.0207295	0.00502001	5.33113e-05	0.000762187	0.128982	13	20576647	ARHGAP6;ARHGAP6	AMELX (+134677), ARHGAP6 (+237611)
cg20834872	0.023039	0.00558672	5.44978e-05	-0.00108059	0.0535374	11	67738253		LATS2 (-42926), SAP18 (-36005)
cg14834466	-0.00845889	0.00205292	5.52576e-05	0.000201777	0.324915	14	56335663	SUV420H1;SUV420H1	SUV420H1 (-894)
cg27175093	0.0137688	0.00334388	5.5879e-05	-0.000518691	0.12095	18	31178523		OTX2 (+11273), C14orf101 (+219400)
cg13034837	-0.0103548	0.00251889	5.74172e-05	0.000283256	0.260227	10	15062622	ZNF24	ZNF24 (-100)
cg23487424	0.01651	0.00401804	5.78465e-05	-0.000528916	0.18779	10	128826083		OLAH (-63278), MEIG1 (+21179)
cg23240294	0.0291165	0.00709011	5.8388e-05	-0.00114883	0.105339	7	2992835	FAM196A;DOCK1	NPS (-411519), DOCK1 (+342071)
cg15658543	0.0326457	0.00795754	5.93613e-05	-0.00108282	0.173399	11	18434711	CARD11	GNA12 (-142351), CARD11 (+57199)
cg24440827	0.0143256	0.0034965	6.06441e-05	-0.000290174	0.405704	3	109230912	LDHAL6A	LDHAL6A (+762)
cg08536805	0.00668953	0.00163328	6.09725e-05	-0.00021044	0.197281	1	234359668		CD47 (+61712), BBX (+506440)
cg06356308	0.0168842	0.00413064	6.29971e-05	-0.000277497	0.500769	X	119329104		NID1 (-64565), GPR137B (-12786)
cg04069374	-0.0198408	0.00485537	6.32988e-05	0.00134903	0.0057853	5	76166910	FAM70A;FAM70A;FAM70A	FAM70A (+314)
cg05262173	0.0239884	0.00587064	6.3349e-05	-0.00126889	0.0311721	5	55566011		S100Z (-14671), F2RL1 (+16322)
cg03936251	0.0169026	0.00413656	6.33495e-05	-0.000531789	0.198275	14	55302403	ANKRD55	MAP3K1 (-580645), IL6ST (-239434)
cg08313491	0.014182	0.00347507	6.46459e-05	-0.000403468	0.245119	5	140285897	RPL13AP3	PELI2 (-352442), KTN1 (+185726)
cg16014000	-0.0184875	0.00453335	6.54075e-05	0.000485893	0.283163	6	30763596	PCDHA7;PCDHAC1;PCDHA12;PCDHA6;PCDHA10;PCDHA4;PCDHA11;PCDHAC1;PCDHA8;PCDHA6;PCDHA1;PCDHA2;PCDHA1;PCDHA9;PCDHA13;PCDHA5;PCDHA3;PCDHA10	PCDHAC2 (-40033), ZMAT2 (+225682)
cg23197007	-0.0173925	0.00427271	6.73887e-05	0.000698223	0.102422	19	9938134	KIAA1949;KIAA1949;KIAA1949	PPP1R18 (-525)
cg16523839	-0.0215384	0.00529378	6.79159e-05	-6.62641e-05	0.900114	16	88085240	COL5A3	OLFM2 (-30065), COL5A3 (+44012)
cg04337688	-0.00672744	0.00165354	6.79458e-05	0.000290833	0.0789283	10	105144419	ANKRD11	ANKRD11 (-771)
cg06102342	0.017114	0.00421706	7.0759e-05	-0.000454918	0.280067	22	20904844	MIR1307;USMG5	PDCD11 (-1982), USMG5 (+1840)
cg22756608	0.0141939	0.00350242	7.23641e-05	-0.00047294	0.176702	X	65176115		TOP3B (-237698), VPREB1 (-24355)
cg26561773	0.0381654	0.00942528	7.33222e-05	0.000316586	0.736289	16	2465929	VSIG4;VSIG4	VSIG4 (+576)
cg23654112	-0.0117301	0.00290172	7.53121e-05	-6.29694e-05	0.827745	10	99147374	TBC1D24	TBC1D24 (+782)
cg26450554	0.0357783	0.0088617	7.68312e-05	-0.000212231	0.810223	1	61314917	RRP12;RRP12	FRAT2 (-62927), RRP12 (+3742)
cg19097500	-0.0153905	0.0038136	7.73579e-05	0.000766718	0.0448623	1	158161960	NFIA	NFIA (-5204)
cg26546310	-0.00900981	0.00223414	7.82426e-05	0.000841224	0.000206349	3	113758778	TAGLN2	TAGLN2 (-53)
cg23144143	0.0245676	0.00609381	7.8621e-05	-0.00136948	0.0251252	17	40484442	ATG3	SLC35A5 (-4806), ATG3 (+4396)
cg02853375	-0.0047854	0.00118761	7.92829e-05	0.000199839	0.0926838	5	156819548	DCAKD;DCAKD	DCAKD (+61)
cg15611624	-0.0166058	0.0041271	8.11247e-05	0.000438951	0.286868	16	23871039	NIPAL4	NIPAL4 (-56)
cg04029168	-0.0164556	0.00410017	8.44432e-05	0.00115383	0.00519871	14	81070065	PRKCB;PRKCB	CACNG3 (-303335), PRKCB (+116239)
cg08086809	-0.00900351	0.00224657	8.63541e-05	0.000532568	0.0182429	5	72568925	SEL1L	SEL1L (-108)
cg14098153	0.0195189	0.0048741	8.73942e-05	-0.000487944	0.31605	X	68641813		TMEM174 (+64147), FOXD1 (+211182)
cg07462256	-0.0223374	0.00558095	8.8146e-05	0.00153045	0.00644082	12	119901179	FAM155B;FAM155B	FAM155B (+11)
cg16175725	0.0180835	0.00451987	8.86798e-05	-0.0011261	0.0131668	8	144951942	HNF1A	HNF1A (+248)
cg09387867	0.0182636	0.00456637	8.91286e-05	-0.00164556	0.00037541	17	37811587	SCRIB;SCRIB	FAM83H (-64041), SCRIB (+17594)
cg11669285	-0.0291454	0.00730601	9.28076e-05	0.00189921	0.00973701	14	63978872	PTRF	STAT3 (-17549), PTRF (+17276)
cg18315834	0.0166903	0.00418693	9.38858e-05	-0.00101994	0.0153137	6	169051521	MTHFD1	AKAP5 (-23097), MTHFD1 (+54361)
cg04213073	0.020517	0.00516111	9.7991e-05	-0.000835454	0.105677	19	43493493		THBS2 (+344540), SMOC2 (+467766)
cg02610227	0.0157053	0.00395128	9.82067e-05	-0.000391657	0.320838	1	247072485	YIF1B;YIF1B;YIF1B;YIF1B;YIF1B;YIF1B;YIF1B	YIF1B (+4952), C19orf33 (+6850)
cg11706999	0.023446	0.00589937	9.83687e-05	-0.00174103	0.00341339	2	176575187	SH3BP5L	LOC646627 (-202712), ZNF672 (-26667)
cg13897925	-0.006551	0.00164912	9.90933e-05	0.000139107	0.39805	16	88411680	KIAA1715;KIAA1715	HOXD10 (-114550), HOXD11 (-105142), HOXD12 (-97588), HOXD13 (-90590), KIAA1715 (+76), EVX2 (+81748)

## Sheet: TableS3
Table S3: Results from the EWAS analysis for current cannabis use in the EU-GEI cohort
IlmnID	Eugi_Beta	Eugi_SE	Eugi_P	Eugi_Beta_smoke	Eugi_smokeP	Name	CHR	MAPINFO	UCSC_RefGene_Name
cg05575921	-0.0570227	0.00724381	3.01647e-14	-0.0197171	5.66375e-124	cg05575921	5	373378	AHRR
cg06472744	0.0546009	0.0108606	7.38117e-07	-0.00178483	0.0386161	cg06472744	6	3296441	SLC22A23;SLC22A23;SLC22A23;SLC22A23
cg26562263	-0.042548	0.00896912	2.88074e-06	0.00338223	2.65975e-06	cg26562263	19	21863715
cg05608790	-0.0270284	0.0057905	4.1059e-06	0.00173907	0.000171619	cg05608790	7	69427388	AUTS2;AUTS2;AUTS2
cg17039793	0.00878762	0.0019072	5.41336e-06	-5.47542e-05	0.717196	cg17039793	10	830909
cg02738272	-0.0145164	0.00315669	5.64043e-06	0.00090309	0.000340893	cg02738272	4	41645242	LIMCH1;LIMCH1;LIMCH1;LIMCH1;LIMCH1
cg26112706	0.01839	0.00401143	6.01855e-06	-0.00124816	0.000100039	cg26112706	6	30616140	C6orf136;C6orf136;C6orf136
cg00805473	0.0169526	0.00375189	8.11452e-06	-0.00055749	0.0613598	cg00805473	13	36289393	MIR548F5
cg00412896	-0.0248235	0.00550545	8.46998e-06	0.00207311	2.74664e-06	cg00412896	2	88474165	THNSL2;THNSL2;THNSL2;THNSL2;THNSL2
cg13420985	-0.0236493	0.00527407	9.46751e-06	0.00132085	0.00168185	cg13420985	3	16524424	RFTN1
cg05357209	0.0390694	0.00877959	1.10197e-05	-0.00228402	0.00110787	cg05357209	7	872208	UNC84A;UNC84A
cg21626848	0.0233102	0.00530168	1.39467e-05	-0.000787226	0.0615391	cg21626848	17	39969267	SC65;FKBP10;FKBP10
cg23454017	-0.0221278	0.00505286	1.50619e-05	0.000558025	0.163976	cg23454017	18	42661756
cg04117994	-0.018957	0.00434004	1.58288e-05	0.00152493	1.173e-05	cg04117994	16	69511694
cg26909477	-0.0164377	0.00377583	1.68667e-05	0.000978274	0.00116037	cg26909477	21	47879575	DIP2A;DIP2A;DIP2A;DIP2A;DIP2A;DIP2A;DIP2A
cg11836767	0.0273582	0.00630489	1.79438e-05	-0.00240791	1.99577e-06	cg11836767	19	48754521	CARD8;CARD8;CARD8;CARD8;CARD8
cg01020080	-0.0181831	0.0042093	1.95262e-05	0.000763718	0.0224814	cg01020080	2	26715609	OTOF;OTOF
cg12674201	-0.00518206	0.00119977	1.95715e-05	0.000202215	0.033931	cg12674201	17	26684581	POLDIP2;POLDIP2;TMEM199;POLDIP2;POLDIP2
cg01521154	-0.0155769	0.00361886	2.08712e-05	0.00083919	0.00360163	cg01521154	12	26111162	RASSF8;RASSF8
cg22390023	-0.014242	0.00330931	2.09385e-05	0.000669145	0.0110405	cg22390023	11	95997732	MAML2
cg08363235	0.0517359	0.0120383	2.14914e-05	-0.00459396	2.03215e-06	cg08363235	10	52176831	SGMS1
cg04901598	-0.0238468	0.00555602	2.20112e-05	0.00123772	0.00514735	cg04901598	10	11726020
cg13879937	0.0323963	0.00756323	2.28487e-05	-0.00217064	0.00032652	cg13879937	15	42265413	EHD4
cg25199111	0.0239767	0.00560182	2.31689e-05	-0.0016091	0.000322718	cg25199111	4	120713033
cg02093418	-0.0253733	0.00593151	2.34141e-05	0.000849837	0.0711924	cg02093418	9	126232853	DENND1A;DENND1A
cg08431693	-0.00997931	0.00234056	2.48727e-05	0.00039691	0.0328559	cg08431693	7	99680287	ZNF3;ZNF3
cg24458400	-0.00281861	0.000661235	2.49809e-05	0.00019599	0.000207987	cg24458400	1	36689884	THRAP3
cg08013890	-0.021443	0.0050577	2.756e-05	0.00100865	0.0121814	cg08013890	12	66965641	GRIP1
cg13685622	-0.0317039	0.00750978	2.97582e-05	0.000709291	0.233774	cg13685622	17	78903373	RPTOR;RPTOR
cg07620928	0.0546242	0.0129575	3.05327e-05	-0.00345041	0.000845314	cg07620928	10	92689909
cg22307330	-0.014716	0.00349777	3.16382e-05	0.000491111	0.0770167	cg22307330	10	103900537	PPRC1;PPRC1;PPRC1
cg11285703	-0.0274533	0.00652677	3.17741e-05	0.00219049	2.78613e-05	cg11285703	15	51534725	CYP19A1;CYP19A1
cg12012381	-0.0130319	0.0030993	3.19728e-05	0.000951856	0.000122556	cg12012381	8	1694654
cg27379942	0.0199609	0.00475356	3.27442e-05	-0.00113591	0.00270985	cg27379942	6	130465046
cg05740244	-0.116463	0.0279269	3.69936e-05	0.00571558	0.0101082	cg05740244	11	18434015	LDHC;LDHC
cg17126544	-0.0187383	0.0044961	3.73995e-05	0.0013314	0.000210799	cg17126544	3	105626578
cg22768287	0.0165943	0.00398678	3.82501e-05	-0.00204517	2.63489e-10	cg22768287	12	93781658	NUDT4P2;NUDT4P1;NUDT4;NUDT4;NUDT4;NUDT4;NUDT4
cg06161753	-0.0127474	0.00306445	3.86679e-05	0.00121175	8.77378e-07	cg06161753	11	114125344
cg17025708	0.0167082	0.00404411	4.35337e-05	-0.000955443	0.00302393	cg17025708	10	114570799	VTI1A
cg26938348	-0.0117946	0.00285524	4.36461e-05	0.000335948	0.138175	cg26938348	10	121356513	TIAL1;TIAL1;TIAL1;TIAL1
cg21459266	-0.020222	0.00489805	4.40645e-05	0.00127674	0.00108335	cg21459266	6	5110727	LYRM4;LYRM4
cg22857356	0.037594	0.0091137	4.47285e-05	-0.00160362	0.0268546	cg22857356	19	8398590	KANK3
cg01970904	0.0236115	0.00572741	4.51906e-05	-0.000722447	0.112029	cg01970904	2	172014013	TLK1;TLK1
cg17135694	-0.0259261	0.0062905	4.53923e-05	0.00118334	0.0180008	cg17135694	3	16524406	RFTN1
cg23274264	-0.024508	0.00594698	4.54643e-05	0.00130904	0.0056984	cg23274264	3	108321497	DZIP3
cg09376855	-0.0271587	0.00659336	4.58454e-05	0.00178281	0.000703233	cg09376855	6	2242748	GMDS
cg26703534	-0.0235715	0.00572405	4.60598e-05	-0.0053418	7.14722e-28	cg26703534	5	377358	AHRR
cg04157161	0.0284214	0.00690955	4.69557e-05	-0.00396307	2.14534e-12	cg04157161	17	7906847	GUCY2D
cg03375579	0.00616147	0.0015009	4.85771e-05	-0.000377973	0.00158561	cg03375579	4	174293063	SAP30
cg21333674	-0.0457148	0.0111368	4.86458e-05	-0.00135533	0.125185	cg21333674	8	96705765
cg17823376	0.0176959	0.00431105	4.8661e-05	-0.000882906	0.0100577	cg17823376	5	145314627	SH3RF2
cg17188901	-0.00746052	0.00181923	4.94485e-05	0.000368758	0.0108456	cg17188901	7	150672175	KCNH2;KCNH2
cg06717560	0.0142893	0.00348529	4.96567e-05	-0.000372513	0.177946	cg06717560	4	62293060
cg13848631	-0.020733	0.00506207	5.05185e-05	0.00077286	0.0545888	cg13848631	2	106226918	LOC285000
cg02127118	0.0283194	0.00692256	5.15504e-05	-0.00148801	0.00692717	cg02127118	16	80027871
cg03548384	-0.0336564	0.00823561	5.24532e-05	0.000517162	0.428347	cg03548384	16	84403863	ATP2C2
cg18768136	0.0603712	0.0147826	5.30521e-05	-0.00336823	0.00422493	cg18768136	10	52096068	SGMS1
cg19891612	-0.0221327	0.00541983	5.31181e-05	0.00217564	6.04459e-07	cg19891612	12	12491627	MANSC1
cg19250799	0.00977321	0.00239564	5.40201e-05	-0.000230527	0.2251	cg19250799	1	47910456
cg27129763	-0.0270471	0.00663837	5.51993e-05	0.00131396	0.0128399	cg27129763	1	90246190
cg12896652	0.0199112	0.00489405	5.65636e-05	-0.0010714	0.0059645	cg12896652	9	6049865
cg02496392	0.0166751	0.00410479	5.80061e-05	-0.00120904	0.000227576	cg02496392	1	27916318	AHDC1
cg07592835	0.022807	0.00562786	6.04013e-05	-0.000943104	0.0349631	cg07592835	7	105715031
cg19281864	-0.0215709	0.00532356	6.05381e-05	0.00126041	0.00296294	cg19281864	3	9396091
cg27382889	0.0223721	0.00552763	6.17035e-05	-0.00190567	1.69334e-05	cg27382889	14	77294657	LRRC74A
cg21262032	-0.0233592	0.00577581	6.24716e-05	0.00126057	0.00611787	cg21262032	1	154437693	IL6R;IL6R
cg14826417	0.0161157	0.00398491	6.25087e-05	-0.00204811	2.44632e-10	cg14826417	7	73244073	CLDN4
cg10031643	0.0189377	0.0046836	6.27045e-05	-0.00164227	1.22128e-05	cg10031643	8	141248429	TRAPPC9;TRAPPC9
cg11377704	0.0235683	0.00583146	6.31789e-05	-0.00233635	6.34481e-07	cg11377704	12	13712733
cg00303311	0.0108903	0.00269985	6.52594e-05	-0.000349489	0.102954	cg00303311	2	113874822	IL1RN;IL1RN;IL1RN
cg05386249	-0.0391574	0.00970938	6.5454e-05	0.00152935	0.0473974	cg05386249	13	111574089
cg26598831	-0.0375163	0.00932728	6.83941e-05	0.00169648	0.0221528	cg26598831	8	64681200
cg09565206	0.0301667	0.00750234	6.87429e-05	-0.00146519	0.0140776	cg09565206	5	52283703	ITGA2;ITGA2;ITGA2;ITGA2;ITGA2;ITGA2
cg25537125	-0.016587	0.00412778	6.94677e-05	0.000966347	0.00329675	cg25537125	2	108993602	SULT1C4
cg23244022	-0.0322782	0.0080342	6.96933e-05	0.00234915	0.000252436	cg23244022	8	144437350
cg10995081	-0.0199035	0.00495992	7.10551e-05	0.00095549	0.0154295	cg10995081	X	48858587	GRIPAP1;GRIPAP1
cg06208060	0.00464748	0.0011605	7.34545e-05	-0.00014824	0.107567	cg06208060	19	38806727	YIF1B;YIF1B;YIF1B;YIF1B;YIF1B;YIF1B
cg23000710	0.0497289	0.01245	7.6634e-05	-0.00315613	0.00147633	cg23000710	11	48231942
cg04286179	0.0275735	0.00690931	7.77424e-05	-0.00119847	0.029083	cg04286179	1	31319041
cg14473522	0.00790909	0.00198612	8.04991e-05	-0.000144248	0.359711	cg14473522	20	2187752
cg05913846	-0.0248663	0.00624828	8.13119e-05	0.00190195	0.000140383	cg05913846	8	50139926
cg18953011	0.0202462	0.0050935	8.29066e-05	-0.000589643	0.144625	cg18953011	17	65040616	CACNG1
cg23410926	-0.0327363	0.00824382	8.42256e-05	0.00113994	0.0815869	cg23410926	8	53677319
cg11019937	0.01881	0.00473965	8.50358e-05	-0.00187295	8.91258e-07	cg11019937	17	5488563	NLRP1;NLRP1;NLRP1;NLRP1;NLRP1
cg14541800	-0.0122074	0.00307914	8.645e-05	0.000689469	0.00492478	cg14541800	9	137111819
cg25111583	0.0218675	0.00552009	8.7544e-05	-0.00125849	0.00420326	cg25111583	4	190860123
cg08895932	0.0359466	0.00907436	8.75819e-05	-0.00232957	0.00128589	cg08895932	1	152778580	LCE1C
cg05966255	-0.0262255	0.00662723	8.90434e-05	0.000321297	0.540821	cg05966255	17	38758057
cg17531025	-0.0251772	0.00636271	8.91331e-05	0.00036658	0.467406	cg17531025	16	29002219
cg08857983	-0.0195915	0.00495661	9.07252e-05	0.000209836	0.593299	cg08857983	2	25467579	DNMT3A;DNMT3A;DNMT3A
cg03627045	0.0157465	0.0039963	9.53353e-05	-0.00104785	0.00101256	cg03627045	4	6774414
cg10704678	-0.013003	0.00330007	9.5351e-05	0.00112791	1.9932e-05	cg10704678	3	44928045	TGM4
cg11387612	0.0205519	0.00521629	9.5462e-05	-0.001296	0.00182912	cg11387612	22	31876061	EIF4ENIF1;EIF4ENIF1;EIF4ENIF1
cg27140633	0.0231542	0.005884	9.73354e-05	-0.00317841	3.19818e-11	cg27140633	11	63685905
cg00712122	-0.00395463	0.0010058	9.86266e-05	0.000241358	0.00260068	cg00712122	2	64751596	AFTPH;AFTPH;AFTPH;AFTPH;AFTPH;AFTPH
cg00554250	-0.0173371	0.00441095	9.91678e-05	0.00144868	4.09015e-05	cg00554250	11	47281370	NR1H3;NR1H3;NR1H3
cg20290964	-0.01988	0.00505868	9.93977e-05	0.000963001	0.0166788	cg20290964	20	18237486
cg15907392	0.0214798	0.00546583	9.94163e-05	-0.00041093	0.343084	cg15907392	12	34494852

## Sheet: TableS4
Table S4: Results from the meta-analysis between current high-potency cannabis users (n=127) and never users (n=494)
for extended results table click this link https://doi.org/10.6084/m9.figshare.26003827.v1
IlmnID	Effect_Fixed	P_Fixed	SE_Fixed	Het P	Genome_Build	CHR	MAPINFO	UCSC_RefGene_Name	GREAT_anno	Beta_GAP	SE_GAP	P_GAP	Beta_Gap_Tobacco	P_GAP_Tobacco	Beta_EUGEI	SE_EUGEI	P_EUGEI	Beta_EUGEITobacco	P_EUGEI_Tobacco
cg05575921	-4.09387	7.56173e-12	0.59794	0.000105782	hg19	5	373378	AHRR	AHRR (+69087), C5orf55 (+69879)	-0.0158539	0.00881008	0.073775	-0.0192798	2.95044e-52	-0.0623617	0.00814171	1.52613e-13	-0.0192897	3.50564e-109
cg27592794	-1.88354	1.53764e-07	0.358907	0.0303335	hg19	10	74454766	MCU	OIT3 (-198572), MCU (+2878)	-0.0259176	0.00485544	3.0902e-07	0.00241298	7.97989e-07	-0.0103045	0.00532897	0.0538862	0.000805779	0.0440785
cg21333674	-4.59295	2.70646e-06	0.978905	0.0575976	hg19	8	96705765		GDF6 (+467254), PLEKHF2 (+559817)	-0.0216798	0.0160914	0.179747	0.00114104	0.464942	-0.060176	0.0123338	1.56413e-06	-0.00118666	0.199464
cg01820754	-1.17263	3.85989e-06	0.253883	0.935073	hg19	14	53418577	FERMT2;FERMT2;FERMT2	FERMT2 (-763)	-0.0119327	0.00358726	0.00108572	0.000421141	0.227008	-0.0115191	0.00359363	0.0014612	0.000655409	0.015286
cg26703534	-2.15739	4.94623e-06	0.472381	0.0339926	hg19	5	377358	AHRR	C5orf55 (+65899), AHRR (+73067)	-0.0109805	0.006876	0.112205	-0.00547379	5.77214e-14	-0.0310425	0.00650074	2.55528e-06	-0.00510252	8.51424e-23
cg14915165	-0.603543	6.46571e-06	0.133807	0.92168	hg19	1	118471929	WDR3;GDAP2;GDAP2	WDR3 (-442), GDAP2 (+372)	-0.00594184	0.00164212	0.000394458	0.000228651	0.152266	-0.00622035	0.00230826	0.00735112	-0.000150918	0.382972
cg08086809	-0.780779	7.85178e-06	0.174703	0.962683	hg19	14	82000312	SEL1L	SEL1L (-108)	-0.00790556	0.00272381	0.0042127	0.000406459	0.12515	-0.00773945	0.00227711	0.000747498	0.000206381	0.226729
cg26561773	3.38201	7.93329e-06	0.757113	0.446287	hg19	X	65259390	VSIG4;VSIG4	VSIG4 (+576)	0.0399785	0.0110773	0.000407824	0.000151979	0.887478	0.0284209	0.0103719	0.00642626	-0.000575861	0.458717
cg00715241	-0.556505	9.45944e-06	0.125645	0.916191	hg19	17	4891081	CAMTA2;CAMTA2;CAMTA2;CAMTA2	CAMTA2 (-417)	-0.0053888	0.0020938	0.010947	0.000308058	0.130504	-0.00566424	0.00157069	0.00035158	0.000155393	0.187071
cg04184273	2.77364	1.09398e-05	0.630701	0.789234	hg19	16	758683		METRN (-6489), STUB1 (+28569)	0.0293164	0.00864388	0.000870897	-0.000288257	0.73094	0.0259375	0.0092232	0.00517219	-0.00203721	0.00336429
cg13734106	-1.79511	1.1591e-05	0.409363	0.468479	hg19	10	131691178	EBF3	EBF3 (+70912), MGMT (+425725)	-0.0151395	0.00563914	0.00800487	0.000170385	0.755364	-0.0210835	0.00595205	0.000445439	0.000935879	0.0363338
cg04836442	1.42601	1.29808e-05	0.327035	0.705308	hg19	1	181204428		CACNA1E (-248257), MR1 (+201868)	0.015412	0.00446923	0.00071652	-0.000403404	0.352527	0.0129323	0.00479822	0.0073421	-0.000962682	0.00767266
cg04781080	-1.75442	1.50691e-05	0.405395	0.848327	hg19	15	68924114	CORO2B	CORO2B (+15236), ANP32A (+189146)	-0.0167013	0.00598803	0.00591098	0.000900238	0.122375	-0.0182574	0.00550826	0.00100499	0.000602864	0.14453
cg09286421	-1.85558	1.69451e-05	0.431354	0.821093	hg19	7	55552130	VOPP1	VOPP1 (+88069), LANCL2 (+118990)	-0.0177392	0.00562558	0.00192016	0.00114617	0.036858	-0.019721	0.00671978	0.00353799	0.00087781	0.0817668
cg15215155	-2.13623	1.77254e-05	0.497749	0.417463	hg19	7	128473311	FLNC;FLNC	ATP6V1F (-29545), FLNC (+2829)	-0.0263251	0.00788911	0.00104815	0.00132633	0.0843402	-0.0180801	0.00641564	0.00507951	0.000110774	0.817703
cg01043119	-0.847343	1.77994e-05	0.197477	0.540278	hg19	10	119001529	SLC18A2	SLC18A2 (+946)	-0.00730844	0.00274203	0.00846007	0.000258178	0.332202	-0.00972879	0.00284639	0.000698331	0.000405571	0.0577255
cg20708199	1.98648	1.95172e-05	0.46518	0.688648	hg19	1	181062601		CACNA1E (-390084), MR1 (+60041)	0.0220009	0.00707526	0.00220985	-0.000326649	0.634082	0.0182383	0.00617377	0.00332771	-0.000500218	0.279759
cg01323212	-1.44429	2.02409e-05	0.338859	0.109537	hg19	6	42719001		RPL7L1 (-128669), TBCC (-5118)	-0.0200872	0.00489108	6.31398e-05	-0.00042644	0.369131	-0.00923309	0.00469907	0.0501472	-0.00122646	0.000545407
cg10984252	-0.444458	2.09314e-05	0.104462	0.871386	hg19	10	115439257	CASP7;CASP7;CASP7;CASP7	CASP7 (-168)	-0.00458104	0.00134226	0.000809641	0.000179321	0.169479	-0.00423497	0.00166356	0.0112942	5.64192e-05	0.650758
cg01169772	-0.480879	2.13818e-05	0.113149	0.518798	hg19	5	41904236	C5orf51	OXCT1 (-33446), FBXO4 (-21119)	-0.00548414	0.0015414	0.000489036	0.000129647	0.386226	-0.00401963	0.00166623	0.0163145	6.04785e-05	0.628035
cg03897607	1.22361	2.19837e-05	0.288333	0.0468429	hg19	2	18768419	NT5C1B;NT5C1B	NT5C1B-RDH14 (+2426), KCNS3 (+708475)	0.0143686	0.00307646	6.22354e-06	-0.000328433	0.271763	-0.00316667	0.008268	0.701929	0.00100517	0.105172
cg15070677	0.542636	2.28291e-05	0.128123	0.561727	hg19	6	33288804	DAXX;DAXX;DAXX;DAXX	ZBTB22 (-3086)	0.00592356	0.00154134	0.000173421	-0.000206982	0.167297	0.00431465	0.00230477	0.0619575	-0.000615598	0.000404902
cg02948236	-0.710696	2.31435e-05	0.167927	0.944451	hg19	16	66864732	NAE1;NAE1;NAE1	NAE1 (+146)	-0.00723488	0.002488	0.00414276	-7.00881e-05	0.771434	-0.00699994	0.00227584	0.00224963	0.000207239	0.224551
cg22999830	-1.0673	2.44949e-05	0.25295	0.620539	hg19	14	93532632	ITPK1;ITPK1;ITPK1;NCRNA00203	ITPK1 (+49630), CHGA (+143188)	-0.0115234	0.00305765	0.000228562	0.000520075	0.0808	-0.00882892	0.00450241	0.0506077	0.00120751	0.000383583
cg20552412	1.47575	2.8093e-05	0.352343	0.438681	hg19	17	3561612	CTNS;CTNS	TAX1BP3 (+10360), CTNS (+21851)	0.0183059	0.00578004	0.0018365	-0.00195999	0.000593798	0.0126593	0.00444473	0.00463326	-0.00127049	0.000156404
cg24718971	0.531958	2.90782e-05	0.127245	0.794535	hg19	5	80256166	RASGRF2	RASGRF2 (-341)	0.00570906	0.00196361	0.00414876	0.000141165	0.4588	0.00503763	0.00167071	0.00273778	8.27829e-06	0.947259
cg24924958	-2.41067	3.06237e-05	0.578267	0.888862	hg19	6	142409993	NMBR	NMBR (-58)	-0.0250881	0.00909748	0.00648152	0.00183582	0.0386742	-0.0234413	0.0074906	0.00188496	0.000805378	0.151719
cg08887146	1.1149	3.26393e-05	0.268376	0.338832	hg19	19	54058516	ZNF331;ZNF331;ZNF331	ZNF331 (+16977), LOC284379 (+48234)	0.0138885	0.00392507	0.000523822	-0.000533142	0.162499	0.0087437	0.00367781	0.017922	-0.000673785	0.0148353
cg18281824	0.38027	3.26623e-05	0.0915416	0.653663	hg19	6	31939884	DOM3Z;STK19;DOM3Z;STK19;STK19	DOM3Z (+147), STK19 (+239)	0.00433157	0.00149244	0.00421349	-0.000220902	0.128222	0.00348372	0.00115905	0.0028236	-0.000162686	0.0615387
cg09142829	-1.62365	3.33535e-05	0.39131	0.805686	hg19	12	8276482	CLEC4A;CLEC4A;CLEC4A;CLEC4A	CLEC4A (+255)	-0.0149987	0.00637438	0.0198107	0.00177597	0.00453735	-0.0169851	0.00495705	0.000677452	0.00154462	3.88403e-05
cg04753872	0.556296	3.36247e-05	0.134131	0.165755	hg19	2	242438285	STK25	STK25 (+9748), FARP2 (+142622)	0.00756408	0.00197073	0.000176626	-0.000464188	0.0160501	0.00383596	0.00183078	0.036801	-0.000262571	0.0561131
cg08872353	-2.8618	3.75589e-05	0.694274	0.41657	hg19	15	68719924	ITGA11	ITGA11 (+4567), FEM1B (+149784)	-0.0365742	0.0120049	0.00269777	0.00253437	0.0306351	-0.0246196	0.0085103	0.00403361	0.00128051	0.0451207
cg11669285	-2.37604	4.14547e-05	0.579632	0.286534	hg19	17	40558061	PTRF	STAT3 (-17549), PTRF (+17276)	-0.0307951	0.00878446	0.000587569	0.00181861	0.0339622	-0.0183357	0.00771394	0.0179439	0.00131679	0.0231298
cg20079298	2.26551	4.42043e-05	0.554683	0.214237	hg19	15	40572326		PLCB2 (+27847), PAK6 (+62698)	0.0356976	0.0118762	0.00306526	-0.00158429	0.170099	0.0190162	0.00627308	0.00259889	-0.000829477	0.0781163
cg13859771	2.14125	4.66743e-05	0.525888	0.320905	hg19	10	101421142	ENTPD7	CUTC (-70815), ENTPD7 (+1880)	0.0266959	0.00748247	0.000472247	-0.00176917	0.0156565	0.0162552	0.00739271	0.0284856	-0.00126272	0.0230464
cg10585872	1.13164	4.68416e-05	0.277987	0.433517	hg19	22	19647281		CLDN5 (-134422), SEPT5 (-54705)	0.0145355	0.00496203	0.00388082	-0.0012125	0.0125524	0.00984395	0.00335595	0.00355461	0.000172794	0.49197
cg08587802	1.65668	5.43428e-05	0.410465	0.681081	hg19	5	1750682		LPCAT1 (-226607), MRPL36 (+49273)	0.0146473	0.00621783	0.0196702	-0.000340293	0.572637	0.0180494	0.00546454	0.00104607	-0.000843992	0.0397566
cg13343549	0.320782	5.74676e-05	0.0797375	0.0572109	hg19	17	80983747	B3GNTL1	ZNF750 (-185817), B3GNTL1 (+25938)	0.00174519	0.00110786	0.117118	-9.65906e-05	0.369133	0.0047799	0.00114856	3.90071e-05	-7.69779e-05	0.371168
cg27304047	-0.490442	5.78479e-05	0.121957	0.255033	hg19	2	97001659	NCAPH	NCAPH (+176)	-0.00367982	0.00162632	0.0249683	0.000383011	0.0160646	-0.00647792	0.0018435	0.000494028	0.00015829	0.252072
cg18578898	-1.2978	5.78837e-05	0.322733	0.494562	hg19	4	122086698	TNIP3;TNIP3	NDNF (-93026), QRFPR (+215482)	-0.0112892	0.00406548	0.00612819	0.00102341	0.0101676	-0.0158557	0.00530697	0.00299082	0.00131164	0.00105076
cg25407888	-0.666677	5.83102e-05	0.165859	0.490548	hg19	8	110346503	ENY2;NUDCD1	ENY2 (-48)	-0.00766367	0.00220039	0.00063608	0.00058456	0.00674368	-0.00535513	0.00252395	0.0344993	0.000187177	0.322453
cg25331550	1.04144	5.83465e-05	0.259104	0.375261	hg19	4	3471397	DOK7;DOK7	DOK7 (+6365), LRPAP1 (+62826)	0.0137391	0.0045578	0.00298419	-0.00125463	0.00503249	0.00882693	0.00314946	0.00532419	-0.00047895	0.0428856
cg14349763	1.32919	5.93196e-05	0.331014	0.0325181	hg19	9	136287025	ADAMTS13;ADAMTS13;ADAMTS13;ADAMTS13	REXO4 (-3862), ADAMTS13 (-94)	0.0207176	0.00479795	2.71719e-05	-0.0019905	3.10291e-05	0.00654714	0.00457267	0.153013	-0.00146247	2.43817e-05
cg03586128	1.61587	5.99969e-05	0.402677	0.618502	hg19	13	113299796		TUBGCP3 (-57316), ATP11A (-44846)	0.0136553	0.00644111	0.035509	-0.00122894	0.0504302	0.0177649	0.00515928	0.000637818	-0.000472715	0.221699
cg14252059	1.49988	6.22495e-05	0.374585	0.501689	hg19	11	120973274	TECTA	TECTA (-100)	0.0159041	0.00398081	9.74381e-05	-0.00140687	0.000351541	0.00800244	0.0110671	0.470066	-0.00163065	0.0497464
cg02647406	-1.01589	6.48125e-05	0.254317	0.288554	hg19	4	20704940	PACRGL;PACRGL	PACRGL (+2905), KCNIP4 (+994377)	-0.00752212	0.0035553	0.0358762	0.000420054	0.224068	-0.0129217	0.00363934	0.000431992	0.000612817	0.0250469
cg00277397	2.14254	6.70836e-05	0.537462	0.281534	hg19	7	71800412	CALN1;CALN1	CALN1 (+76947)	0.0274927	0.00778658	0.000538033	-0.000575706	0.446142	0.0159042	0.00742783	0.0328879	0.000997348	0.0736407
cg08536805	0.656124	6.99703e-05	0.165005	0.0106526	hg19	3	107748222		CD47 (+61712), BBX (+506440)	0.0091079	0.00192795	4.93868e-06	-0.000400043	0.0335641	-0.000411923	0.00319026	0.897331	5.48869e-05	0.818343
cg08233864	1.08106	7.71262e-05	0.273467	0.983017	hg19	13	113631110	MCF2L	F7 (-128994), MCF2L (+7576)	0.0109047	0.0051986	0.0374717	-0.00123479	0.0151955	0.0107746	0.00321552	0.000885457	-0.00117572	1.5227e-06
cg05141787	1.79038	7.83326e-05	0.453325	0.662141	hg19	11	2193284	TH;TH;TH	TH (-250)	0.0209703	0.00835469	0.0130422	-0.000135243	0.867413	0.0166243	0.00539678	0.00221564	-0.000880241	0.0299441
cg26634219	1.18821	7.88038e-05	0.300964	0.144174	hg19	17	46608277	HOXB1	HOXB1 (-6)	0.0164547	0.00434297	0.000212214	-0.000124177	0.768106	0.00765716	0.00417457	0.0673898	-0.000294741	0.346172
cg13507506	-0.555846	8.14362e-05	0.141073	0.288705	hg19	2	289147	FAM150B	FAM150B (-840)	-0.00685301	0.00186519	0.000322783	0.000621992	0.000726324	-0.00382796	0.00215651	0.0766764	8.00917e-05	0.620075
cg25945004	-1.6755	8.22219e-05	0.425488	0.29779	hg19	13	114265942	TFDP1;TFDP1	TFDP1 (+26887), ATP4B (+46570)	-0.0215584	0.00627593	0.000750358	0.000463582	0.446566	-0.0126691	0.00578824	0.0292133	6.08386e-05	0.888408
cg19589060	-1.58288	8.3773e-05	0.402425	0.797639	hg19	5	176326516	HK3	HK3 (-184)	-0.0167983	0.00552217	0.00273736	0.000954899	0.0759222	-0.0147307	0.00587666	0.0125998	0.00272578	1.48721e-09
cg13560452	-1.96932	8.60369e-05	0.501492	0.906421	hg19	6	137813584	OLIG3;OLIG3	IFNGR1 (-273018), OLIG3 (+1946)	-0.0192543	0.00625213	0.00243051	0.00179676	0.00344164	-0.0204851	0.0083978	0.0151649	0.00200107	0.00157481
cg15942185	1.0961	8.65752e-05	0.27923	0.658195	hg19	7	129912487	CPA2	CPA4 (-20486), CPA2 (+5785)	0.0126404	0.0047125	0.00805984	-0.000338571	0.459082	0.0100523	0.00346634	0.00394586	0.000110924	0.669261
cg25727093	-1.60168	9.63575e-05	0.410732	0.724222	hg19	20	44463168	SNX21;SNX21;SNX21;SNX21	SNX21 (+699)	-0.0177199	0.00633794	0.00579487	0.00038257	0.533826	-0.0147837	0.00539304	0.0064057	-0.000262686	0.515634

## Sheet: TableS5
Table S5: Results from the EWAS analysis for high potency current cannabis use in the GAP cohort
IlmnID	Beta	SE	P	Beta_Tobacco	P_Tobacco	Genome_Build	CHR	MAPINFO	UCSC_RefGene_Name
cg27592794	-0.0259176	0.00485544	3.0902e-07	0.00241298	7.97989e-07	37	10	74454766	CCDC109A
cg08536805	0.0091079	0.00192795	4.93868e-06	-0.000400043	0.0335641	37	3	107748222
cg03897607	0.0143686	0.00307646	6.22354e-06	-0.000328433	0.271763	37	2	18768419	NT5C1B;NT5C1B
cg06144905	0.0588198	0.0128886	9.80926e-06	-0.00084971	0.496842	37	17	27369780	PIPOX
cg25384247	0.00888498	0.00196918	1.21946e-05	-0.000497733	0.00986899	37	17	4890629	CAMTA2;CAMTA2;CAMTA2;CAMTA2;CAMTA2;CAMTA2
cg16318259	-0.00632237	0.00141773	1.51846e-05	0.000207102	0.133247	37	3	128839665	RAB43
cg14834466	-0.010181	0.00235367	2.63449e-05	0.000313247	0.171096	37	11	67981677	SUV420H1;SUV420H1
cg14349763	0.0207176	0.00479795	2.71719e-05	-0.0019905	3.10291e-05	37	9	136287025	ADAMTS13;ADAMTS13;ADAMTS13;ADAMTS13
cg19772754	-0.00671534	0.00158619	3.81991e-05	0.000373313	0.0161337	37	7	105924651	NAMPT
cg07372840	0.00736852	0.00175649	4.45696e-05	-0.000417405	0.0151486	37	5	180296196
cg25023241	-0.0120434	0.00287656	4.60666e-05	0.000362952	0.194297	37	1	26560532	CCDC21
cg04667158	0.0166774	0.00403006	5.58168e-05	-0.000616855	0.115797	37	7	96750500	ACN9
cg01323212	-0.0200872	0.00489108	6.31398e-05	-0.00042644	0.369131	37	6	42719001
cg23610420	-0.0128327	0.00312597	6.35613e-05	9.54695e-05	0.75281	37	1	206859216	MAPKAPK2;MAPKAPK2
cg11857794	0.0177936	0.00434542	6.62094e-05	-0.00110698	0.009316	37	11	27834102
cg14075934	-0.0319225	0.007798	6.6496e-05	0.000850671	0.261471	37	2	200137014	SATB2
cg21718276	0.014813	0.00366196	8.03542e-05	-0.00125933	0.000499013	37	19	17949299	JAK3
cg17906168	0.0492626	0.0122211	8.48821e-05	-0.00310932	0.00940423	37	13	107144353	EFNB2
cg14734994	0.0141744	0.00352015	8.63104e-05	-0.000708544	0.0391645	37	2	88468372	THNSL2
cg20594345	-0.0158494	0.00394461	8.92433e-05	0.00151216	0.000111619	37	6	28973520	ZNF311
cg27026192	-0.0469641	0.0117161	9.25635e-05	0.00189266	0.097098	37	16	57836960	KIFC3;KIFC3
cg05526376	-0.00589306	0.00147069	9.30978e-05	0.000565773	0.000105819	37	7	97736360	LMTK2;LMTK2
cg23949936	0.0264466	0.00660321	9.37811e-05	-0.000287602	0.653383	37	4	100212502	ADH1A
cg01328164	-0.00894801	0.0022355	9.46641e-05	0.00051505	0.0184694	37	9	35814704	HINT2
cg04213073	0.0249705	0.00624089	9.5241e-05	-0.0010207	0.0930524	37	6	169309596
cg16704920	0.0295159	0.00737711	9.52761e-05	0.000384542	0.591011	37	1	2169407	SKI
cg14252059	0.0159041	0.00398081	9.74381e-05	-0.00140687	0.000351541	37	11	120973274	TECTA

## Sheet: TableS6
Table S6: Results from the EWAS analysis for high potency current cannabis use in the EU-GEI cohort
for extended results table click this link https://doi.org/10.6084/m9.figshare.26003827.v1
IlmnID	Beta	SE	P	Beta_Tobacco	P_Tobacco	CHR	MAPINFO	UCSC_RefGene_Name
cg05575921	-0.0570227	0.00724381	3.01647e-14	-0.0197171	5.66375e-124	5	373378	AHRR
cg06472744	0.0546009	0.0108606	7.38117e-07	-0.00178483	0.0386161	6	3296441	SLC22A23;SLC22A23;SLC22A23;SLC22A23
cg26562263	-0.042548	0.00896912	2.88074e-06	0.00338223	2.65975e-06	19	21863715
cg05608790	-0.0270284	0.0057905	4.1059e-06	0.00173907	0.000171619	7	69427388	AUTS2;AUTS2;AUTS2
cg17039793	0.00878762	0.0019072	5.41336e-06	-5.47542e-05	0.717196	10	830909
cg02738272	-0.0145164	0.00315669	5.64043e-06	0.00090309	0.000340893	4	41645242	LIMCH1;LIMCH1;LIMCH1;LIMCH1;LIMCH1
cg26112706	0.01839	0.00401143	6.01855e-06	-0.00124816	0.000100039	6	30616140	C6orf136;C6orf136;C6orf136
cg00805473	0.0169526	0.00375189	8.11452e-06	-0.00055749	0.0613598	13	36289393	MIR548F5
cg00412896	-0.0248235	0.00550545	8.46998e-06	0.00207311	2.74664e-06	2	88474165	THNSL2;THNSL2;THNSL2;THNSL2;THNSL2
cg13420985	-0.0236493	0.00527407	9.46751e-06	0.00132085	0.00168185	3	16524424	RFTN1
cg05357209	0.0390694	0.00877959	1.10197e-05	-0.00228402	0.00110787	7	872208	UNC84A;UNC84A
cg21626848	0.0233102	0.00530168	1.39467e-05	-0.000787226	0.0615391	17	39969267	SC65;FKBP10;FKBP10
cg23454017	-0.0221278	0.00505286	1.50619e-05	0.000558025	0.163976	18	42661756
cg04117994	-0.018957	0.00434004	1.58288e-05	0.00152493	1.173e-05	16	69511694
cg26909477	-0.0164377	0.00377583	1.68667e-05	0.000978274	0.00116037	21	47879575	DIP2A;DIP2A;DIP2A;DIP2A;DIP2A;DIP2A;DIP2A
cg11836767	0.0273582	0.00630489	1.79438e-05	-0.00240791	1.99577e-06	19	48754521	CARD8;CARD8;CARD8;CARD8;CARD8
cg01020080	-0.0181831	0.0042093	1.95262e-05	0.000763718	0.0224814	2	26715609	OTOF;OTOF
cg12674201	-0.00518206	0.00119977	1.95715e-05	0.000202215	0.033931	17	26684581	POLDIP2;POLDIP2;TMEM199;POLDIP2;POLDIP2
cg01521154	-0.0155769	0.00361886	2.08712e-05	0.00083919	0.00360163	12	26111162	RASSF8;RASSF8
cg22390023	-0.014242	0.00330931	2.09385e-05	0.000669145	0.0110405	11	95997732	MAML2
cg08363235	0.0517359	0.0120383	2.14914e-05	-0.00459396	2.03215e-06	10	52176831	SGMS1
cg04901598	-0.0238468	0.00555602	2.20112e-05	0.00123772	0.00514735	10	11726020
cg13879937	0.0323963	0.00756323	2.28487e-05	-0.00217064	0.00032652	15	42265413	EHD4
cg25199111	0.0239767	0.00560182	2.31689e-05	-0.0016091	0.000322718	4	120713033
cg02093418	-0.0253733	0.00593151	2.34141e-05	0.000849837	0.0711924	9	126232853	DENND1A;DENND1A
cg08431693	-0.00997931	0.00234056	2.48727e-05	0.00039691	0.0328559	7	99680287	ZNF3;ZNF3
cg24458400	-0.00281861	0.000661235	2.49809e-05	0.00019599	0.000207987	1	36689884	THRAP3
cg08013890	-0.021443	0.0050577	2.756e-05	0.00100865	0.0121814	12	66965641	GRIP1
cg13685622	-0.0317039	0.00750978	2.97582e-05	0.000709291	0.233774	17	78903373	RPTOR;RPTOR
cg07620928	0.0546242	0.0129575	3.05327e-05	-0.00345041	0.000845314	10	92689909
cg22307330	-0.014716	0.00349777	3.16382e-05	0.000491111	0.0770167	10	103900537	PPRC1;PPRC1;PPRC1
cg11285703	-0.0274533	0.00652677	3.17741e-05	0.00219049	2.78613e-05	15	51534725	CYP19A1;CYP19A1
cg12012381	-0.0130319	0.0030993	3.19728e-05	0.000951856	0.000122556	8	1694654
cg27379942	0.0199609	0.00475356	3.27442e-05	-0.00113591	0.00270985	6	130465046
cg05740244	-0.116463	0.0279269	3.69936e-05	0.00571558	0.0101082	11	18434015	LDHC;LDHC
cg17126544	-0.0187383	0.0044961	3.73995e-05	0.0013314	0.000210799	3	105626578
cg22768287	0.0165943	0.00398678	3.82501e-05	-0.00204517	2.63489e-10	12	93781658	NUDT4P2;NUDT4P1;NUDT4;NUDT4;NUDT4;NUDT4;NUDT4
cg06161753	-0.0127474	0.00306445	3.86679e-05	0.00121175	8.77378e-07	11	114125344
cg17025708	0.0167082	0.00404411	4.35337e-05	-0.000955443	0.00302393	10	114570799	VTI1A
cg26938348	-0.0117946	0.00285524	4.36461e-05	0.000335948	0.138175	10	121356513	TIAL1;TIAL1;TIAL1;TIAL1
cg21459266	-0.020222	0.00489805	4.40645e-05	0.00127674	0.00108335	6	5110727	LYRM4;LYRM4
cg22857356	0.037594	0.0091137	4.47285e-05	-0.00160362	0.0268546	19	8398590	KANK3
cg01970904	0.0236115	0.00572741	4.51906e-05	-0.000722447	0.112029	2	172014013	TLK1;TLK1
cg17135694	-0.0259261	0.0062905	4.53923e-05	0.00118334	0.0180008	3	16524406	RFTN1
cg23274264	-0.024508	0.00594698	4.54643e-05	0.00130904	0.0056984	3	108321497	DZIP3
cg09376855	-0.0271587	0.00659336	4.58454e-05	0.00178281	0.000703233	6	2242748	GMDS
cg26703534	-0.0235715	0.00572405	4.60598e-05	-0.0053418	7.14722e-28	5	377358	AHRR
cg04157161	0.0284214	0.00690955	4.69557e-05	-0.00396307	2.14534e-12	17	7906847	GUCY2D
cg03375579	0.00616147	0.0015009	4.85771e-05	-0.000377973	0.00158561	4	174293063	SAP30
cg21333674	-0.0457148	0.0111368	4.86458e-05	-0.00135533	0.125185	8	96705765
cg17823376	0.0176959	0.00431105	4.8661e-05	-0.000882906	0.0100577	5	145314627	SH3RF2
cg17188901	-0.00746052	0.00181923	4.94485e-05	0.000368758	0.0108456	7	150672175	KCNH2;KCNH2
cg06717560	0.0142893	0.00348529	4.96567e-05	-0.000372513	0.177946	4	62293060
cg13848631	-0.020733	0.00506207	5.05185e-05	0.00077286	0.0545888	2	106226918	LOC285000
cg02127118	0.0283194	0.00692256	5.15504e-05	-0.00148801	0.00692717	16	80027871
cg03548384	-0.0336564	0.00823561	5.24532e-05	0.000517162	0.428347	16	84403863	ATP2C2
cg18768136	0.0603712	0.0147826	5.30521e-05	-0.00336823	0.00422493	10	52096068	SGMS1
cg19891612	-0.0221327	0.00541983	5.31181e-05	0.00217564	6.04459e-07	12	12491627	MANSC1
cg19250799	0.00977321	0.00239564	5.40201e-05	-0.000230527	0.2251	1	47910456
cg27129763	-0.0270471	0.00663837	5.51993e-05	0.00131396	0.0128399	1	90246190
cg12896652	0.0199112	0.00489405	5.65636e-05	-0.0010714	0.0059645	9	6049865
cg02496392	0.0166751	0.00410479	5.80061e-05	-0.00120904	0.000227576	1	27916318	AHDC1
cg07592835	0.022807	0.00562786	6.04013e-05	-0.000943104	0.0349631	7	105715031
cg19281864	-0.0215709	0.00532356	6.05381e-05	0.00126041	0.00296294	3	9396091
cg27382889	0.0223721	0.00552763	6.17035e-05	-0.00190567	1.69334e-05	14	77294657	LRRC74A
cg21262032	-0.0233592	0.00577581	6.24716e-05	0.00126057	0.00611787	1	154437693	IL6R;IL6R
cg14826417	0.0161157	0.00398491	6.25087e-05	-0.00204811	2.44632e-10	7	73244073	CLDN4
cg10031643	0.0189377	0.0046836	6.27045e-05	-0.00164227	1.22128e-05	8	141248429	TRAPPC9;TRAPPC9
cg11377704	0.0235683	0.00583146	6.31789e-05	-0.00233635	6.34481e-07	12	13712733
cg00303311	0.0108903	0.00269985	6.52594e-05	-0.000349489	0.102954	2	113874822	IL1RN;IL1RN;IL1RN
cg05386249	-0.0391574	0.00970938	6.5454e-05	0.00152935	0.0473974	13	111574089
cg26598831	-0.0375163	0.00932728	6.83941e-05	0.00169648	0.0221528	8	64681200
cg09565206	0.0301667	0.00750234	6.87429e-05	-0.00146519	0.0140776	5	52283703	ITGA2;ITGA2;ITGA2;ITGA2;ITGA2;ITGA2
cg25537125	-0.016587	0.00412778	6.94677e-05	0.000966347	0.00329675	2	108993602	SULT1C4
cg23244022	-0.0322782	0.0080342	6.96933e-05	0.00234915	0.000252436	8	144437350
cg10995081	-0.0199035	0.00495992	7.10551e-05	0.00095549	0.0154295	X	48858587	GRIPAP1;GRIPAP1
cg06208060	0.00464748	0.0011605	7.34545e-05	-0.00014824	0.107567	19	38806727	YIF1B;YIF1B;YIF1B;YIF1B;YIF1B;YIF1B
cg23000710	0.0497289	0.01245	7.6634e-05	-0.00315613	0.00147633	11	48231942
cg04286179	0.0275735	0.00690931	7.77424e-05	-0.00119847	0.029083	1	31319041
cg14473522	0.00790909	0.00198612	8.04991e-05	-0.000144248	0.359711	20	2187752
cg05913846	-0.0248663	0.00624828	8.13119e-05	0.00190195	0.000140383	8	50139926
cg18953011	0.0202462	0.0050935	8.29066e-05	-0.000589643	0.144625	17	65040616	CACNG1
cg23410926	-0.0327363	0.00824382	8.42256e-05	0.00113994	0.0815869	8	53677319
cg11019937	0.01881	0.00473965	8.50358e-05	-0.00187295	8.91258e-07	17	5488563	NLRP1;NLRP1;NLRP1;NLRP1;NLRP1
cg14541800	-0.0122074	0.00307914	8.645e-05	0.000689469	0.00492478	9	137111819
cg25111583	0.0218675	0.00552009	8.7544e-05	-0.00125849	0.00420326	4	190860123
cg08895932	0.0359466	0.00907436	8.75819e-05	-0.00232957	0.00128589	1	152778580	LCE1C
cg05966255	-0.0262255	0.00662723	8.90434e-05	0.000321297	0.540821	17	38758057
cg17531025	-0.0251772	0.00636271	8.91331e-05	0.00036658	0.467406	16	29002219
cg08857983	-0.0195915	0.00495661	9.07252e-05	0.000209836	0.593299	2	25467579	DNMT3A;DNMT3A;DNMT3A
cg03627045	0.0157465	0.0039963	9.53353e-05	-0.00104785	0.00101256	4	6774414
cg10704678	-0.013003	0.00330007	9.5351e-05	0.00112791	1.9932e-05	3	44928045	TGM4
cg11387612	0.0205519	0.00521629	9.5462e-05	-0.001296	0.00182912	22	31876061	EIF4ENIF1;EIF4ENIF1;EIF4ENIF1
cg27140633	0.0231542	0.005884	9.73354e-05	-0.00317841	3.19818e-11	11	63685905
cg00712122	-0.00395463	0.0010058	9.86266e-05	0.000241358	0.00260068	2	64751596	AFTPH;AFTPH;AFTPH;AFTPH;AFTPH;AFTPH
cg00554250	-0.0173371	0.00441095	9.91678e-05	0.00144868	4.09015e-05	11	47281370	NR1H3;NR1H3;NR1H3
cg20290964	-0.01988	0.00505868	9.93977e-05	0.000963001	0.0166788	20	18237486
cg15907392	0.0214798	0.00546583	9.94163e-05	-0.00041093	0.343084	12	34494852

## Sheet: TableS7
Table S7: Meta analysis of Main effect of current cannabis use with interaction cannabis use * FEP status		Table S7: Meta analysis of Main effect and interaction terms of current cannabis use model with an interaction term of cannabis use* FEP status
for extended results table click this link https://doi.org/10.6084/m9.figshare.26003827.v1
IlmnID	Effect_Fixed_Main	P_Fixed_Main	Het P_MAIN	SE_Fixed_Main	Effect_Fixed_interaction	P_Fixed_interaction	SE_Fixed_Interaction	Het P_interaction	CHR	MAPINFO	UCSC_RefGene_Name	GREAT_anno	GAP_Beta	GAP_SE	GAP_Pvalue	GAP_Interaction_Beta	GAP_Interaction_SE	GAP_Interaction_P-value	EU-GEI_Beta	EU-GEI_SE	EU-GEI_Pvalue	EU-GEI_Interaction_beta	EU-GEI_Interaction_SE	EU-GEI_Interaction_Pvalue
cg27138281	4.19985	3.62158e-08	0.356709	0.762448	-3.65939	3.24538e-05	0.880608	0.303784	6	84140898	ME1	ME1 (+39)	0.0585472	0.0195071	0.00303043	-0.059028	0.0235259	0.0128988	0.0390145	0.00828341	3.37719e-06	-0.0329385	0.00949646	0.000577706
cg17063780	-3.60721	2.22164e-07	0.463902	0.696403	2.52463	0.00205169	0.818983	0.774281	12	103816811	C12orf42;C12orf42	STAB2 (-164257), ASCL1 (+465360)	-0.0311266	0.00969985	0.00155165	0.0228509	0.0116982	0.0521706	-0.041333	0.0100045	4.35587e-05	0.0275491	0.0114695	0.0167441
cg20502417	-2.35169	4.13844e-07	0.645626	0.464534	2.33272	1.49286e-05	0.538767	0.866681	2	242710250		GAL3ST2 (-5989), D2HGDH (+36221)	-0.0273424	0.00952814	0.00455091	0.0216233	0.0114911	0.061323	-0.0223241	0.00532051	3.32204e-05	0.0238073	0.00609966	0.000110691
cg00523224	-2.76728	7.15629e-07	0.873914	0.558248	2.02808	0.00210981	0.659684	0.399435	17	16310862		TRPV2 (-7993), UBB (+26496)	-0.0269646	0.00714685	0.000212504	0.0249551	0.00861921	0.00420901	-0.028781	0.00894066	0.00138617	0.0136704	0.01025	0.183027
cg04917576	3.14812	8.21639e-07	0.96959	0.638543	-1.91971	0.0100964	0.746241	0.871598	12	67337583		CAND1 (-325477), GRIP1 (-264659)	0.031785	0.010213	0.00212877	-0.020781	0.0123171	0.0931303	0.0312861	0.00818177	0.000151375	-0.0182786	0.00937993	0.0520007
cg24458400	-0.295006	2.56917e-06	0.00717477	0.0627331	0.166216	0.0242252	0.0737576	0.0429545	1	36689884	THRAP3	THRAP3 (-132)	-0.00129918	0.000877823	0.140446	0.000124921	0.00105867	0.906187	-0.00467327	0.000896844	2.96001e-07	0.00311213	0.00102818	0.00262417
cg18699533	-1.5179	2.62117e-06	0.556091	0.323063	1.35623	0.00035357	0.379629	0.804683	15	66083941	DENND4A;DENND4A	DENND4A (+689)	-0.013277	0.00456914	0.00407588	0.0125746	0.00551045	0.0235448	-0.0170804	0.00456845	0.000210668	0.0144546	0.00523747	0.00603728
cg09979956	-0.487816	4.22163e-06	0.769583	0.106043	0.366549	0.00360705	0.125935	0.269998	2	190648634	ORMDL1;ORMDL1;PMS1;PMS1;PMS1	PMS1 (-176), ORMDL1 (+462)	-0.00507833	0.00126154	8.06515e-05	0.00460718	0.00152144	0.00278446	-0.00439613	0.00195768	0.0252526	0.00161627	0.00224437	0.471837
cg01725872	2.55466	4.24603e-06	0.445155	0.555486	-2.46564	0.000163101	0.653977	0.847629	22	45635600	C22orf9	UPK3A (-45267), NUP50 (+75875)	0.0216087	0.00758005	0.00481917	-0.0234291	0.00914165	0.0111155	0.0301145	0.00816392	0.000255137	-0.0259429	0.00935947	0.0058231
cg12026095	-0.669866	4.46029e-06	0.836045	0.145982	0.483397	0.00394319	0.167691	0.906018	19	49468461	FTL	FTL (-104)	-0.0081616	0.00721803	0.259525	0.00382548	0.00870505	0.660806	-0.00663627	0.00149062	1.09289e-05	0.00487284	0.00170891	0.00456815
cg26561773	4.13322	5.07954e-06	0.436468	0.906115	-1.80323	0.0898388	1.06307	0.980489	X	65259390	VSIG4;VSIG4	VSIG4 (+576)	0.048845	0.0132405	0.000290077	-0.0183237	0.0159682	0.252542	0.0347143	0.012427	0.00545428	-0.0178004	0.0142468	0.212207
cg17220042	-0.374225	7.10343e-06	0.698008	0.0833359	0.29073	0.00255574	0.0963748	0.900599	20	32274205	E2F1;E2F1	E2F1 (+4)	-0.00304989	0.0019694	0.123051	0.00317845	0.00237513	0.182344	-0.00389327	0.000919763	2.83826e-05	0.00285386	0.00105446	0.0070786
cg02948236	-0.890906	7.30765e-06	0.294009	0.198662	0.497995	0.0327681	0.233262	0.221743	16	66864732	NAE1;NAE1;NAE1	NAE1 (+146)	-0.0110603	0.00285467	0.000144796	0.00807396	0.00344278	0.0199975	-0.00688881	0.00276642	0.0131563	0.00235426	0.00317154	0.458319
cg22777467	-3.20004	1.35671e-05	0.640399	0.735514	3.37227	7.41166e-05	0.851009	0.675368	5	125826160	GRAMD3;GRAMD3;GRAMD3;GRAMD3;GRAMD3	ALDH7A1 (+104921)	-0.0248836	0.0169174	0.142894	0.025957	0.0204026	0.204766	-0.0336592	0.00816745	4.54755e-05	0.0353583	0.00936351	0.000182325
cg18578898	-1.69074	1.67894e-05	0.516159	0.392847	0.569455	0.22031	0.464595	0.655927	4	122086698	TNIP3;TNIP3	NDNF (-93026), QRFPR (+215482)	-0.0149337	0.00496717	0.00298161	0.00737945	0.00599048	0.219446	-0.0202038	0.00641948	0.00176609	0.0031515	0.00735957	0.668713
cg24305906	-6.9439	2.0376e-05	0.82966	1.62974	7.4595	9.12614e-05	1.90647	0.639706	2	241352106		OTOS (-272034), GPC1 (-23008)	-0.0652356	0.0254427	0.0110806	0.0858497	0.0306843	0.0056475	-0.0723637	0.021223	0.000713595	0.0675184	0.024331	0.0057678
cg07782789	-0.756053	2.21245e-05	0.379461	0.178218	0.538243	0.0100921	0.209217	0.787935	5	81147843		ATG10 (-120000), SSBP2 (-100772)	-0.00918933	0.00257112	0.000440578	0.00599806	0.00310081	0.0544812	-0.00605426	0.00247253	0.0147509	0.00486796	0.00283461	0.0866598
cg25849196	-1.47199	2.74576e-05	0.324117	0.351011	1.48359	0.000302882	0.410646	0.190334	2	175198280		SP9 (-1540)	-0.010585	0.00546863	0.0543275	0.00807733	0.00659525	0.222121	-0.017617	0.00457748	0.000137347	0.019115	0.00524782	0.000303966
cg02508848	1.16686	2.94309e-05	0.758916	0.279299	-0.804703	0.0142626	0.328373	0.323062	16	68573721	ZFP90	ZFP90 (+61), ZFP90 (+535)	0.0108287	0.00391043	0.00614849		0.00471604	0.0166086	0.0125434	0.00399057	0.00178985	-0.00489917	0.00457496	0.284847

## Sheet: TableS8
Table S8: Meta analysis of Main effect and interaction terms of the high-potency cannabis use model with an interaction term of cannabis use* FEP status
for extended results table click this link https://doi.org/10.6084/m9.figshare.26003827.v1
IlmnID	Effect_Fixed_MAIN	P_Fixed_Main	SE_Fixed	Het P_MAIN	Effect_Fixed_interaction	P_Fixed_interaction	Interaction_SE	Het P_interaction	CHR	MAPINFO	UCSC_RefGene_Name	GREAT_anno	Beta_GAP	SE_GAP	P_GAP_MAIN	Beta_Interaction_GAP	SE_Interaction_GAP	P_Interaction_GAP	Eugi_Beta	Eugi_SE	Eugi_P	Eugi_beta_INT	Eugi_se_int	Eugi_P_int
cg14082739	-4.19042	1.46798e-07	0.797183	0.930295	3.36588	0.000244938	0.917761	0.996954	9	127025282	NEK6;NEK6;NEK6;NEK6	NEK6 (+5087), PSMB7 (+152438)	-0.0427008	0.0121032	0.000544017	0.0336199	0.0137103	0.0152543	-0.0412938	0.0105946	0.000114609	0.0336904	0.0123537	0.00668128
cg24995678	-5.27611	2.79738e-07	1.02716	0.0104623	5.18545	1.2788e-05	1.18832	0.0246496	2	235936394	SH3BP4	AGAP1 (-466338), SH3BP4 (+75767)	-0.00911149	0.0199046	0.647736	0.00880017	0.0225476	0.69683	-0.0686039	0.0119916	2.13388e-08	0.068412	0.0139826	1.46656e-06
cg13808936	-2.87159	2.28059e-06	0.607509	0.0405751	2.52329	0.000335257	0.703569	0.0586975	9	136371164		SLC2A6 (-26889), TMEM8C (+18903)	-0.0514652	0.0126616	7.46516e-05	0.0488609	0.0143428	0.000828355	-0.0219124	0.00692417	0.00167662	0.0177457	0.00807382	0.02855
cg22777467	-3.84031	3.15845e-06	0.824058	0.522201	3.6837	0.000119607	0.957569	0.583771	5	125826160	GRAMD3;GRAMD3;GRAMD3;GRAMD3;GRAMD3	ALDH7A1 (+104921)	-0.0529383	0.0241615	0.02987	0.0508848	0.0273698	0.0648075	-0.0364897	0.0087662	3.88798e-05	0.0348777	0.0102217	0.000713141
cg05058748	6.59346	3.30402e-06	1.41766	0.34731	-6.10312	0.000188775	1.63465	0.849079	2	235903542	SH3BP4	AGAP1 (-499190), SH3BP4 (+42915)	0.048905	0.0230068	0.0350368	-0.0571686	0.0260617	0.0296811	0.0763584	0.0179998	2.77743e-05	-0.0635363	0.0209884	0.00263467
cg24305906	-9.30807	4.02739e-06	2.01912	0.850439	9.39211	5.46957e-05	2.32789	0.53208	2	241352106		OTOS (-272034), GPC1 (-23008)	-0.0882588	0.0325828	0.00747509	0.111818	0.0369093	0.00284898	-0.0960868	0.0257263	0.0002162	0.0820993	0.0299978	0.00649131
cg00673251	2.26998	5.02503e-06	0.497395	0.302653	-1.63029	0.00467579	0.576366	0.28029	10	11784140	ECHDC3	ECHDC3 (-215)	0.0326094	0.0108244	0.00300387	-0.0279877	0.0122617	0.0237506	0.0200473	0.00560021	0.000388033	-0.0129889	0.00653005	0.0474002
cg24573898	-3.60281	5.57944e-06	0.793268	0.0692746	2.54422	0.00575884	0.921417	0.064534	2	203715		FAM110C (-157128), ACP1 (-61153)	-0.0733033	0.0219989	0.00106642	0.0682418	0.0249201	0.00686014	-0.0304569	0.00850486	0.000386055	0.0186643	0.00991696	0.0605848
cg02897008	-0.855134	5.96401e-06	0.188869	0.845978	0.951978	1.2006e-05	0.217472	0.272742	1	4188697		AJAP1 (-526407), DFFB (+414853)	-0.00812739	0.00288623	0.00546443	0.0121974	0.00326948	0.000263306	-0.00886884	0.00249771	0.00043178	0.00739509	0.00291242	0.0115058
cg23960723	2.33079	6.05284e-06	0.515144	0.701637	-2.12265	0.000371673	0.596346	0.940598	10	11783974	ECHDC3	ECHDC3 (-381)	0.0198404	0.0104143	0.0585263	-0.021985	0.0117971	0.0641786	0.0244312	0.00592739	4.60997e-05	-0.0209661	0.00691154	0.00258175
cg08452870	-3.67794	7.02692e-06	0.818617	0.821288	2.84477	0.00272279	0.949075	0.621725	7	158264935	PTPRN2;PTPRN2;PTPRN2	PTPRN2 (+115546)	-0.0405514	0.0185971	0.0306519	0.0377275	0.0210665	0.0751686	-0.0358729	0.00911695	9.88486e-05	0.0260847	0.0106307	0.0145824
cg11782515	-4.16857	1.03526e-05	0.945324	0.335878	3.74034	0.000644841	1.09623	0.19012	19	4986183	KDM4B	KDM4B (+17060), PTPRS (+354630)	-0.0607217	0.0219237	0.00626232	0.0666011	0.0248348	0.00807746	-0.0373382	0.0104773	0.000411666	0.0303379	0.0122169	0.0134437
cg16637873	4.82314	1.18953e-05	1.1013	0.165744	-4.02575	0.00169687	1.28261	0.449996	12	6982822	SPSB2;SPSB2	SPSB2 (-374)	-0.0260605	0.054721	0.634539	0.00555555	0.0619871	0.928696	0.0513676	0.011243	6.61907e-06	-0.0423066	0.0131098	0.00135788
cg03586128	2.60368	1.44459e-05	0.600346	0.807144	-1.5098	0.029359	0.693004	0.994426	13	113299796		TUBGCP3 (-57316), ATP11A (-44846)	0.0240035	0.0102676	0.0206124	-0.0150328	0.0116309	0.19802	0.0270931	0.00740027	0.000286311	-0.0151339	0.00862898	0.0802543
cg13093989	1.8092	2.07807e-05	0.42506	0.954897	-1.72712	0.000396721	0.487576	0.141993	1	245254391	EFCAB2;EFCAB2;EFCAB2	KIF26B (-63895), EFCAB2 (+121221)	0.0183053	0.0056824	0.00154028	-0.0234422	0.00643694	0.000363298	0.017821	0.00640473	0.0056609	-0.00896461	0.00746814	0.230732

## Sheet: TableS9
TableS9: Epigenetic age acceleration and cannabis use analysis: To determine if there was evidence of epigentic age acceleration in four different epigenetic clocks a linear model was used to investigate the relationship with current cannabis use with age+sex+ tobacco + psychosis status+ cell composition +methplate as covariates
	EU-GEI			GAP
Epigenetic age	Coefficient	SE	P value	Coefficient	SE	P value
PoA	0.0171268	0.0163029	0.29406	-0.0145708	0.018622	0.4349
Horvath	0.03631	0.7229	0.96	-1.67577	1.10067	0.1295
Hannum	0.09538	0.52544	0.856045	-1.79671	0.99497	0.07253
Pheno	-0.364875	0.851397	0.66846	-3.44355	1.14208	0.00292

## Sheet: TableS10
TableS10: Association between epigenetic age acceleration and cannabis use in subjects with FEP: To determine if there was evidence of epigentic age acceleration in four different epigenetic clocks a linear model was used to investigate the relationship with current cannabis use within individuals with FEP with age+sex+ tobacco + cell composition +methplate as covariates
While we saw no evidence of age acceleration there was a trend in the opposite direction with some epigenetic clocks showing notable age deacceleration in the GAP cohort. While unexpected, inconsistent reports of epigenetic acceleration and deacceleration are also reported in the schizophrenia epigenetic literature.
	EU-GEI (118 nonusers v 69 current users)			GAP (70 nonusers v 59 current users)
Epigenetic age	Coefficient	SE	P value	Coefficient	SE	P value
PoA	0.029582	0.025897	0.255016	-0.0088036	0.0268177	0.743356
Horvath(residulas)	-2.39528	1.01681	0.01969	-3.50889	1.71639	0.04342
Hannum (residulas)	-0.15902	0.70525	0.82189	-2.69866	1.55208	0.085
Pheno(residuals)	-1.38621	1.18368	0.2433	-4.76008	1.78989	0.00905

[truncated: 5 more sheets: TableS11, TableS12, TableS13, TableS14, Sheet1]
